# Supplementary material for: Resilience and livestock adaptations to demographic growth and technological change: A diachronic perspective from the Late Bronze Age to Late Antiquity in NE Iberia
Source: PubMed Central journal article supplement (PMC7888671; doi:10.1371/journal.pone.0246201), 2021-02-17

types and geographical areas of sites (n=10) during the 'LBA' period

type.of.site

geographical.area

| num | Site                         |
|-----|------------------------------|
| 14a | Can Gambus 3                 |
| 15a | Can Roqueta CRV              |
| 15b | Can Roqueta TR               |
| 16  | Carretela                    |
| 18  | Cova Punta Farisa            |
| 21  | Fonollera                    |
| 43a | Sant Marti Empuries          |
| 63  | Vilot de Montagut 0_I_II_III |
| 64  | Vincament                    |
| 65  | Zafranales                   |

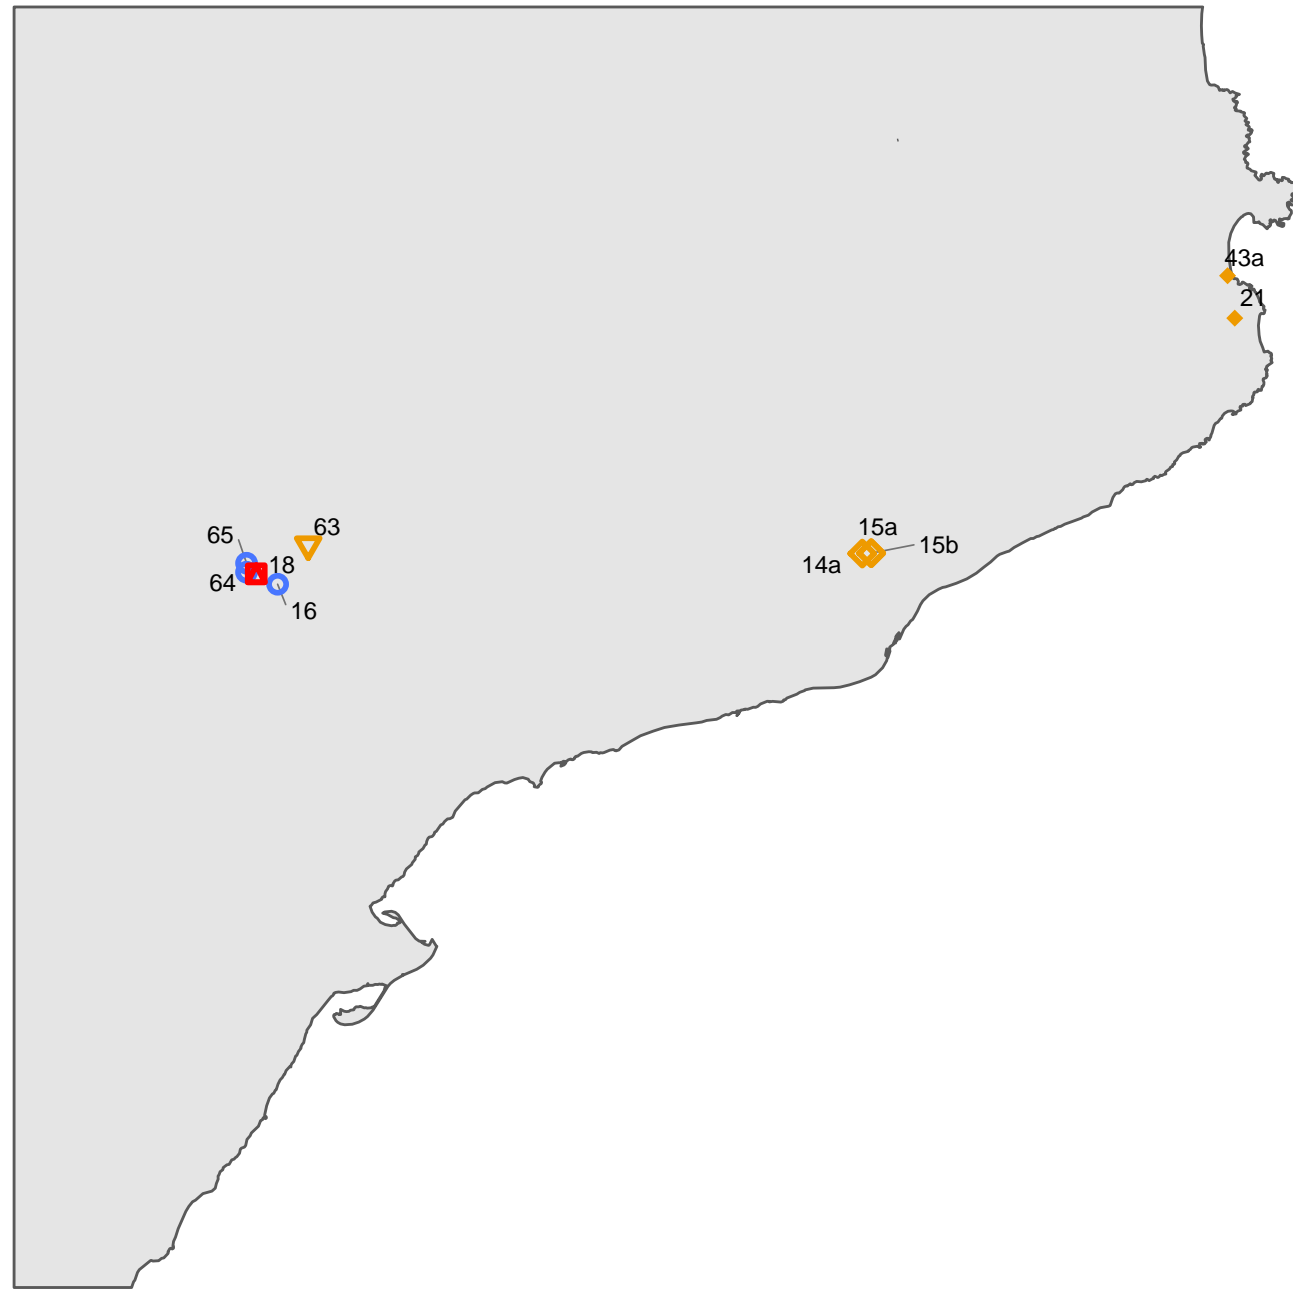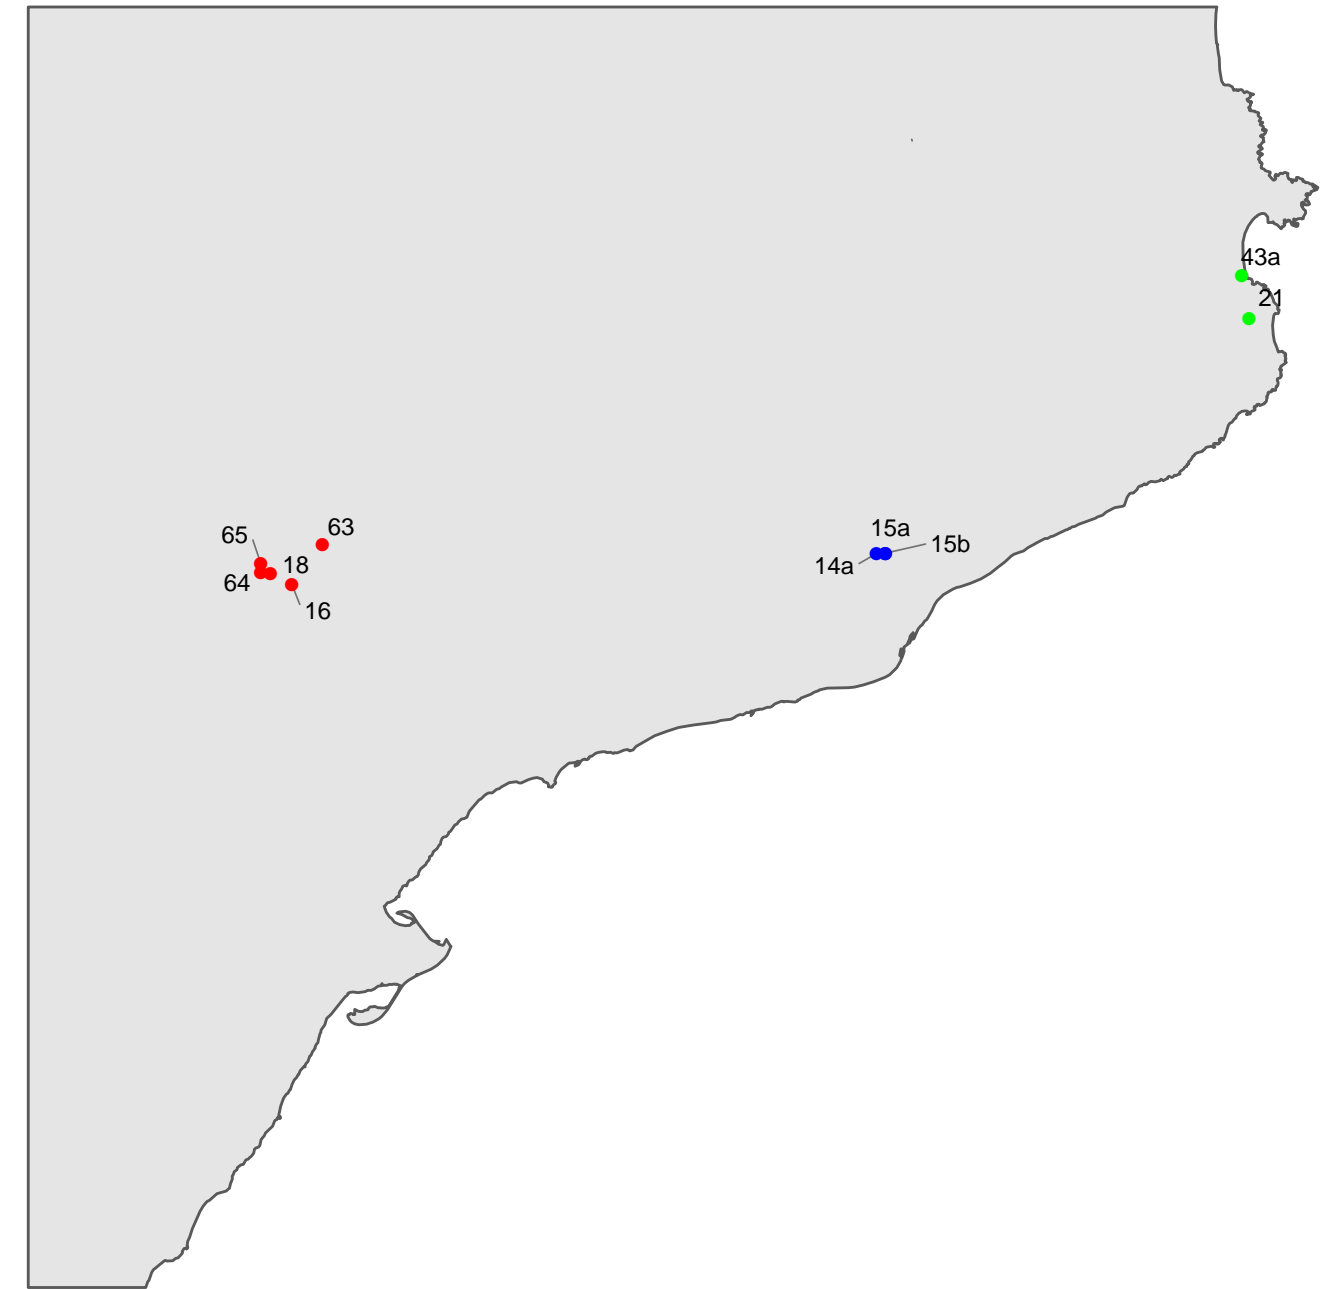

types and geographical areas of sites (n=14) during the 'EIA' period

type.of.site

geographical.area

| num | Site                             |
|-----|----------------------------------|
| 107 | Mas Duran                        |
| 15c | Can Roqueta_DIASA                |
| 37  | La Pedrera IV_V_VI_VII           |
| 39  | Puig de la Misericordia          |
| 40a | Puig de la Nau                   |
| 42  | Sant Jaume Mas d en Serra_sect 1 |
| 43b | Sant Marti Empuries              |
| 48  | Sitges UAB                       |
| 55a | Tossal Molinet I_II              |
| 57a | Turo Font de la Canya 0          |
| 59a | Vilars 0_1                       |
| 6a  | Barranc de Gafols_1              |
| 6b  | Barranc de Gafols_2              |
| 90a | Mas d en Boixos                  |

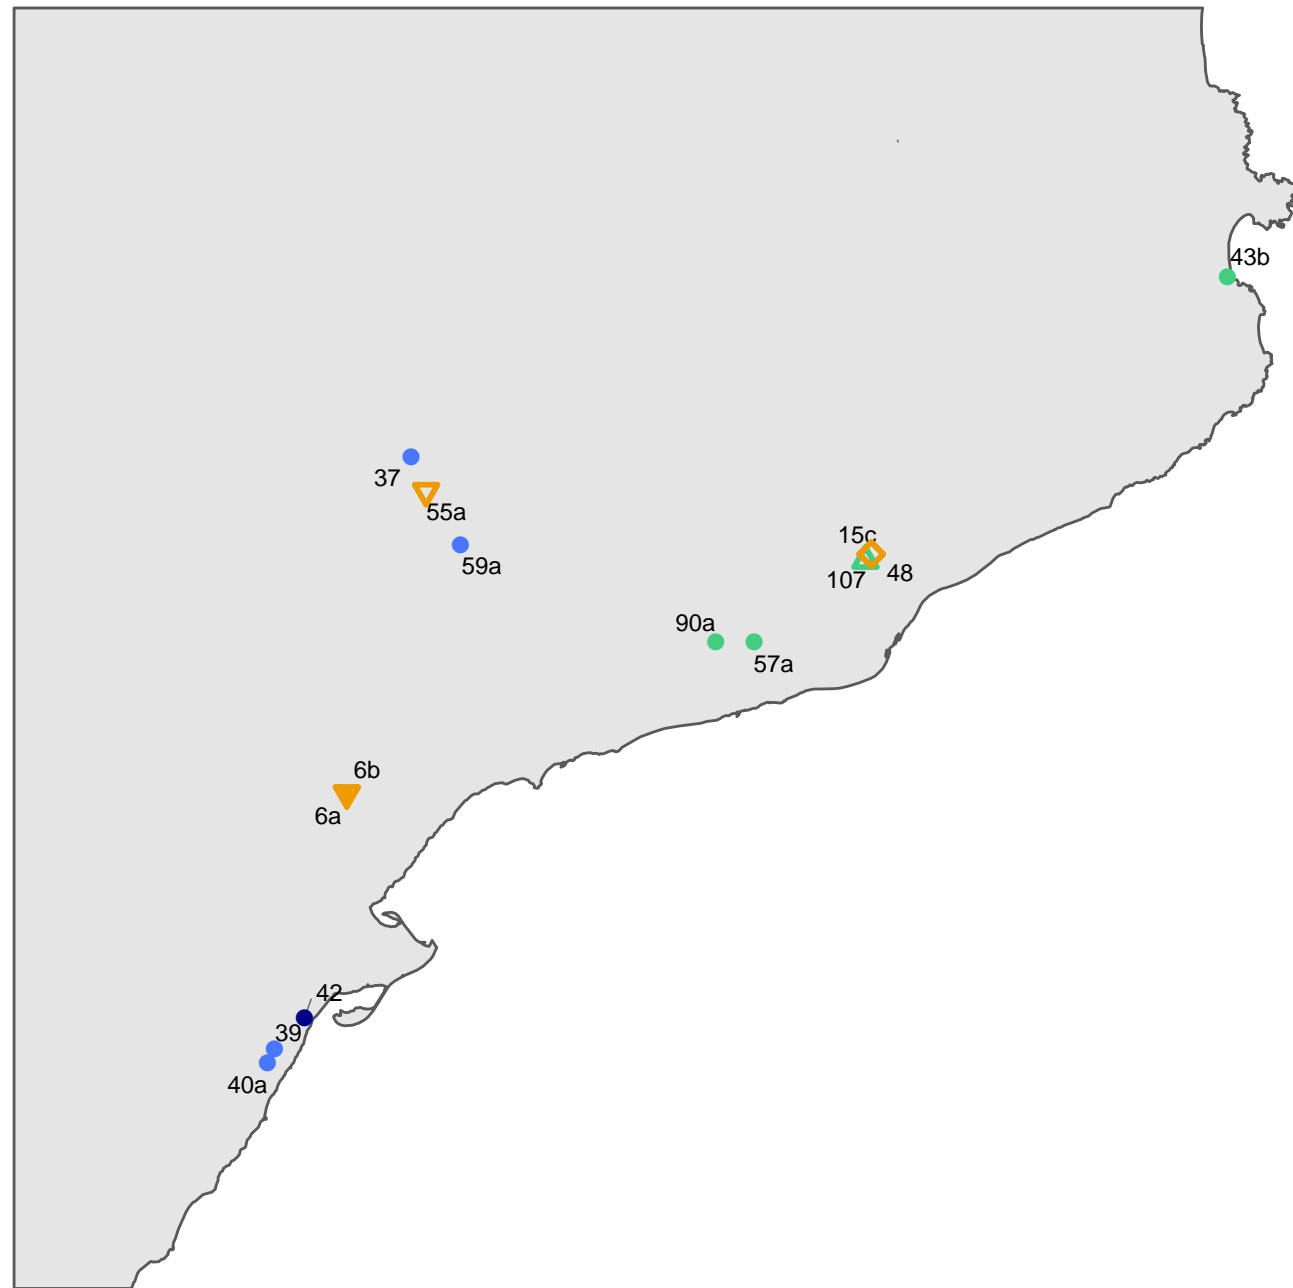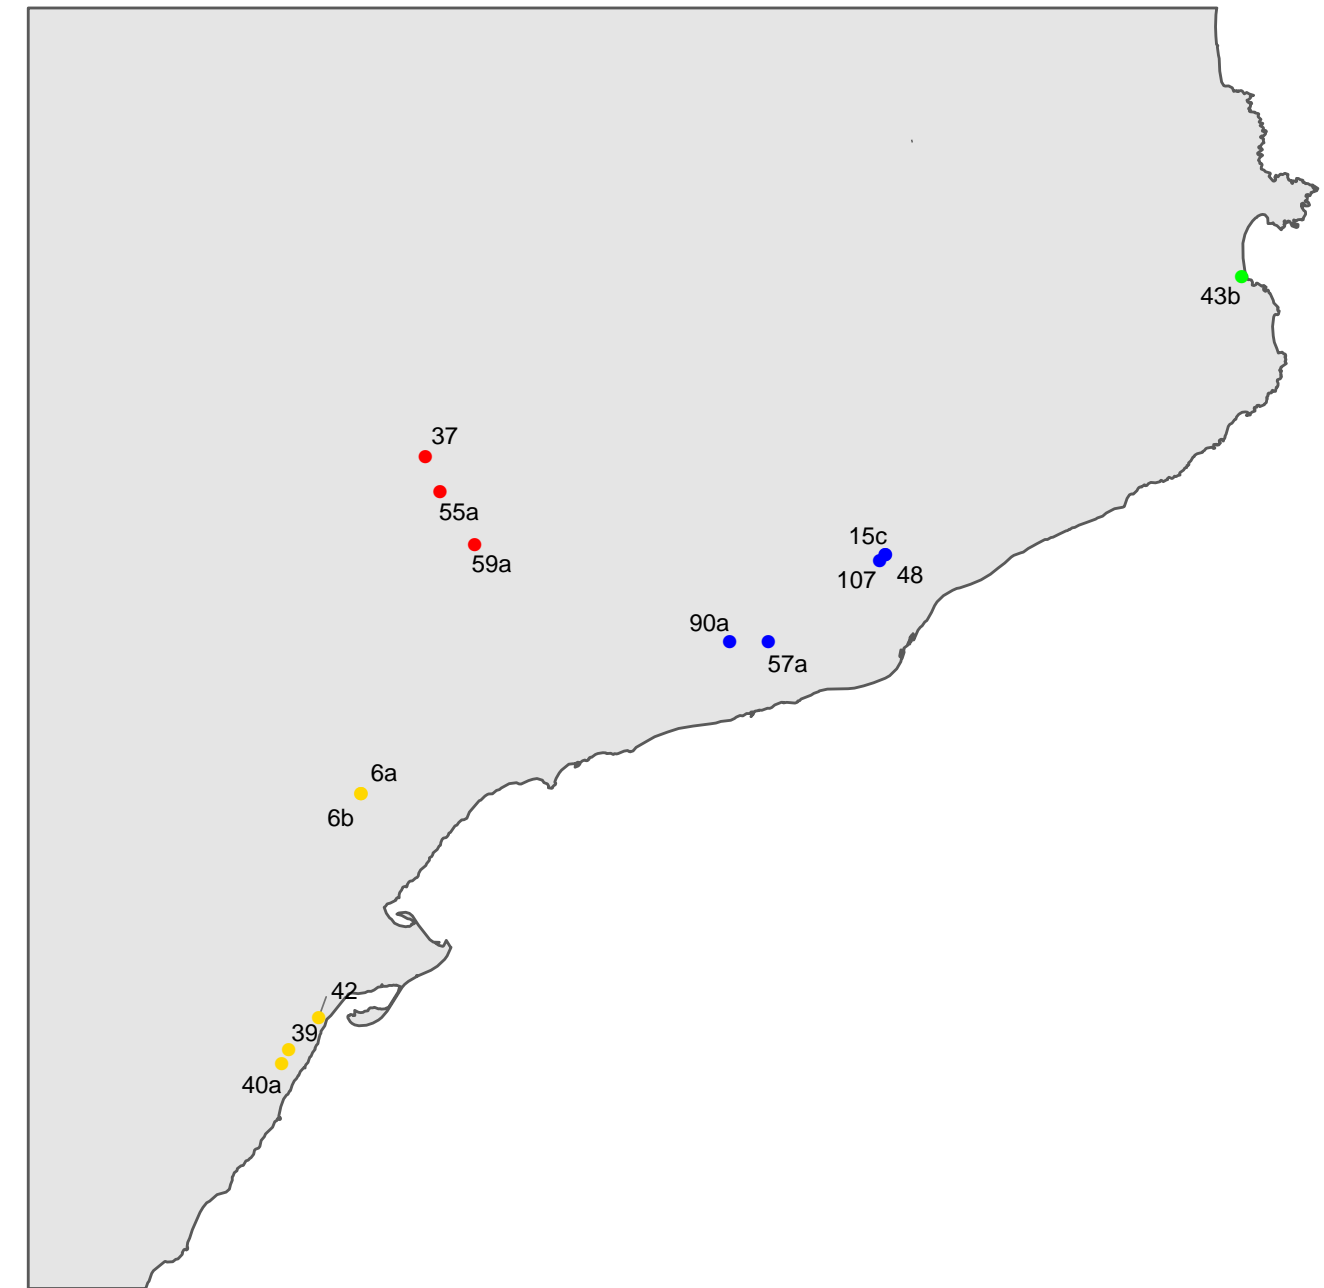

types and geographical areas of sites (n=14) during the 'MIA1' period

type.of.site

geographical.area

| num | Site                       |
|-----|----------------------------|
| 14b | Can Gambus 3               |
| 19a | Empuries                   |
| 24a | Illa d'en Reixach 2_3      |
| 2a  | Alorda Park 2a             |
| 33a | Moli Espigol               |
| 40b | Puig de la Nau             |
| 43c | Sant Marti Empuries        |
| 44a | Sant Sebastia de la Guarda |
| 55b | Tossal Molinet III         |
| 57b | Turo Font de la Canya 1    |
| 59b | Vilars II                  |
| 89a | Torre Roja                 |
| 90b | Mas d'en Boixos            |
| 9a  | Ca n'Oliver 1              |

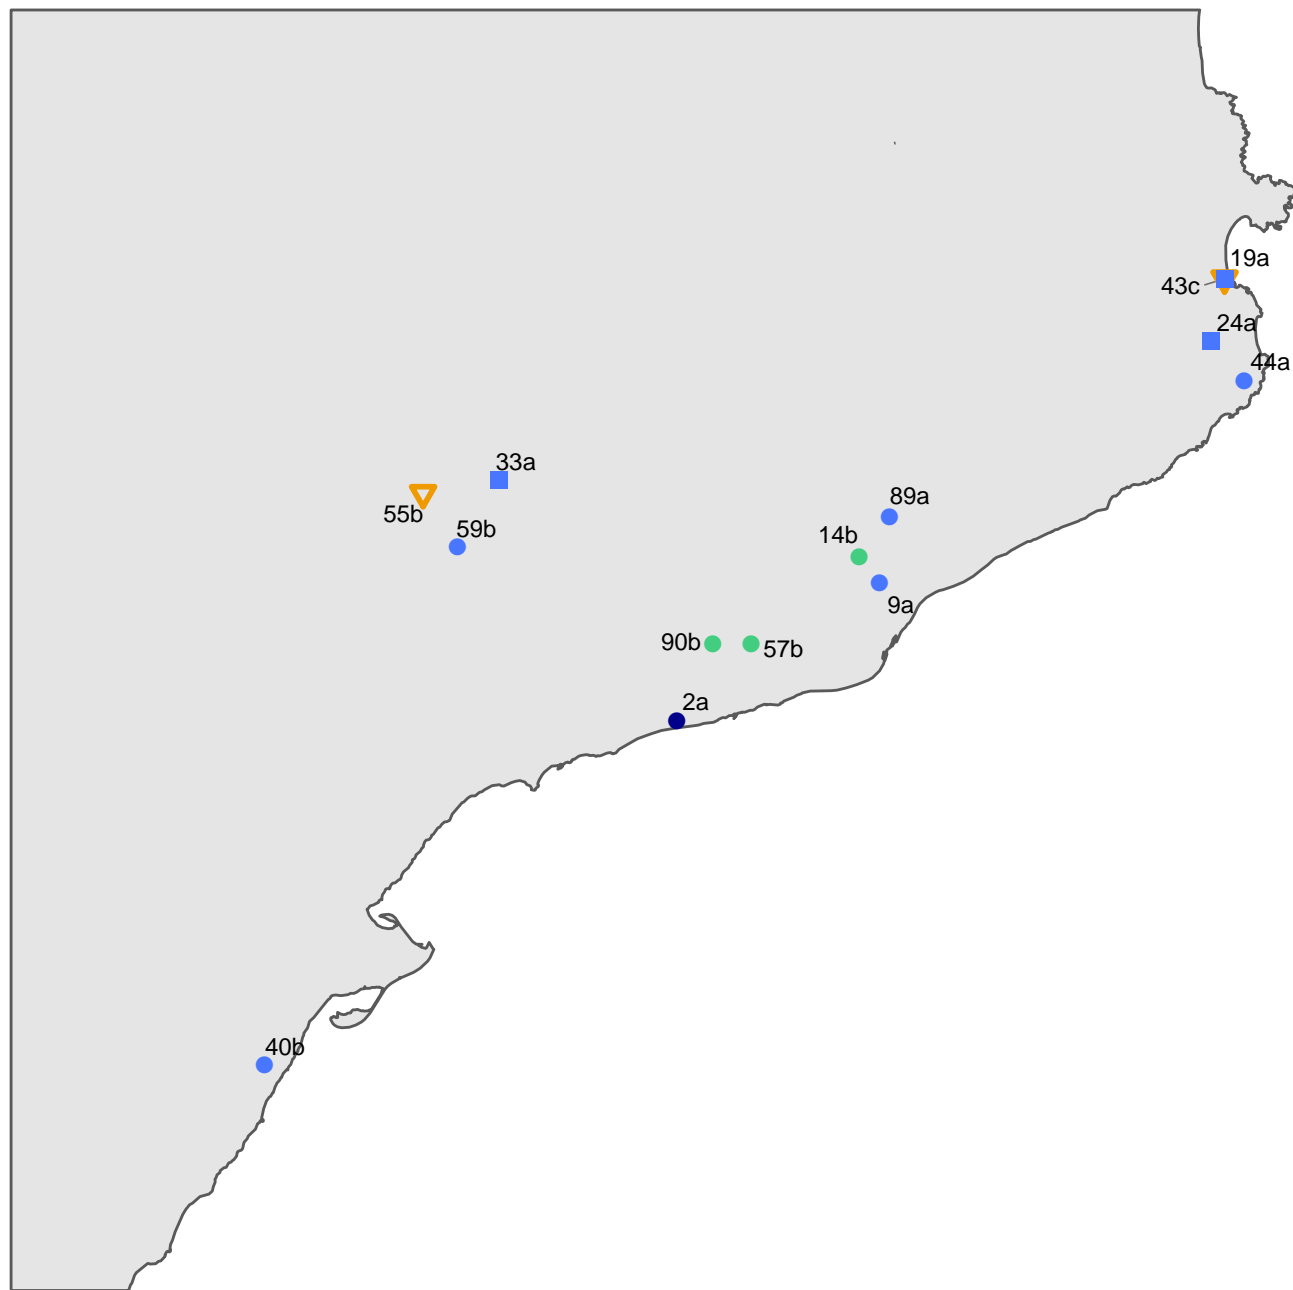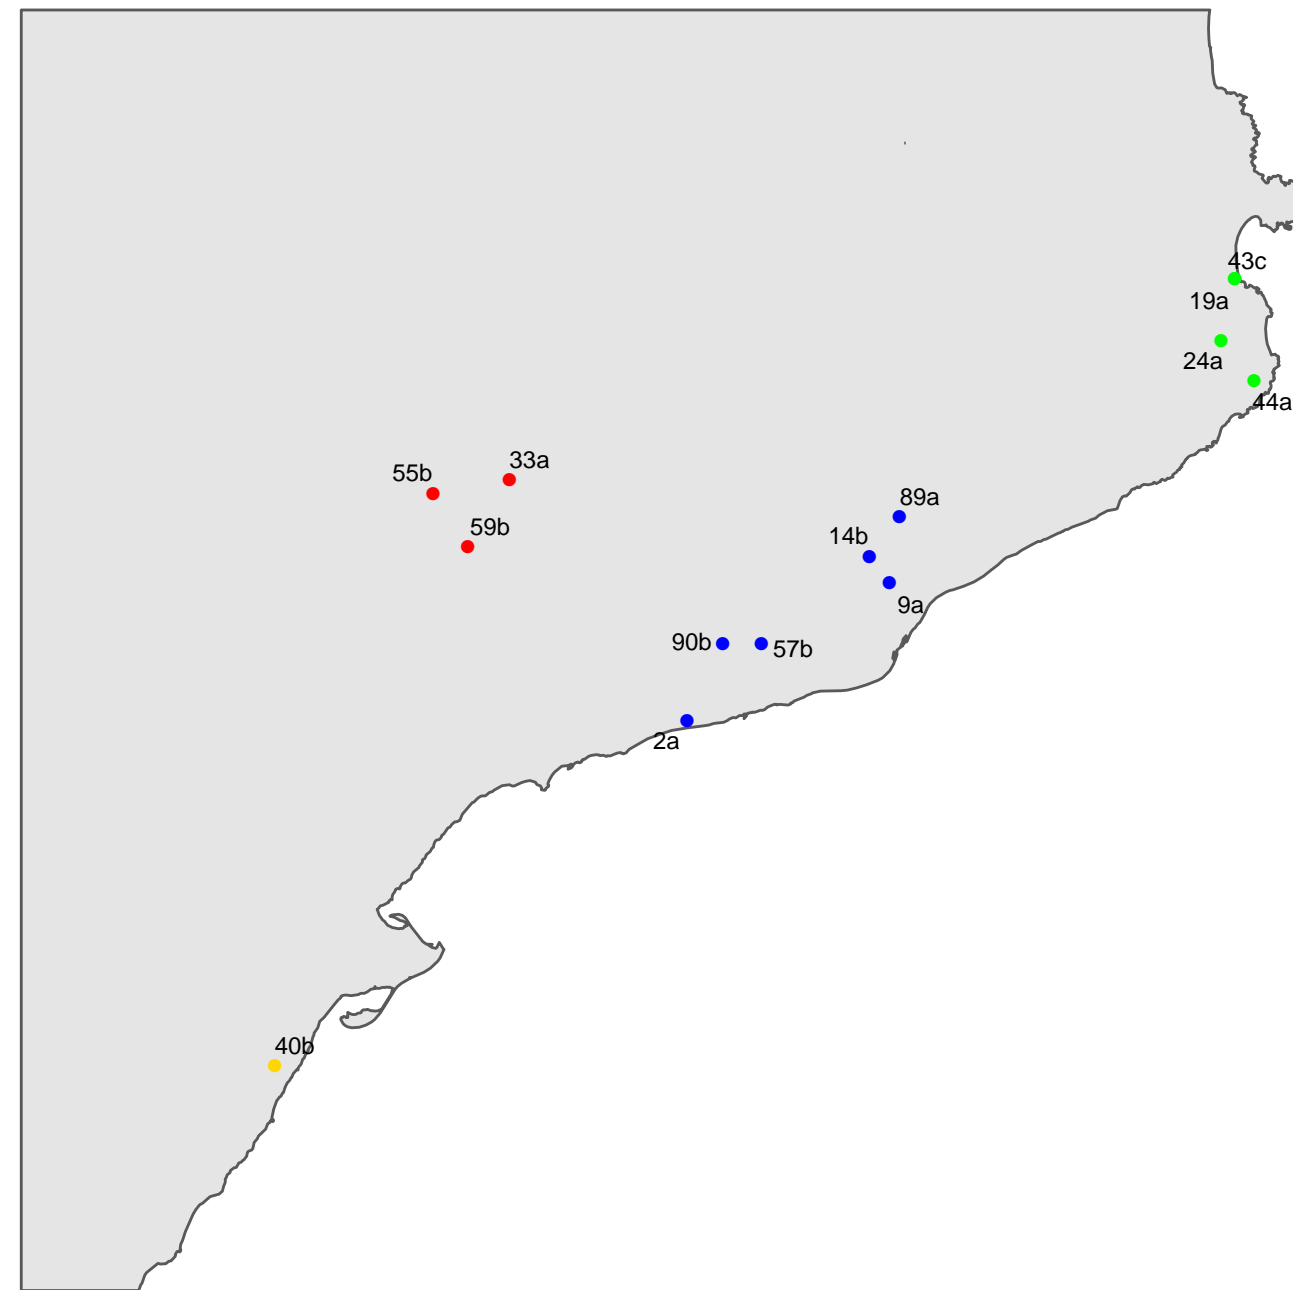

types and geographical areas of sites (n=28) during the 'MIA2' period

type.of.site

| num  | Site                      |
|------|---------------------------|
| 1    | Esquerda                  |
| 103a | Can Rodon                 |
| 10a  | Can Bartomeu              |
| 14c  | Can Gambus 1              |
| 17   | Ciutadella de Roses       |
| 22   | Gou Batlle                |
| 24b  | Illa d'en Reixach 4_5_6   |
| 25   | Puig Castellar            |
| 29a  | Mas Castellar fortificat  |
| 29b  | Mas Castellar rural       |
| 2b   | Alorda Park 2b            |
| 32   | Moleta del Remei 1_2      |
| 33b  | Moli Espigol              |
| 34a  | Olerdola 1                |
| 35   | Olius                     |
| 38   | Penya del Moro            |
| 46   | Saus                      |
| 47a  | Sigarra                   |
| 50a  | St. Julia de Ramis        |
| 56   | Turo del Vent 1_2         |
| 57c  | Turo Font de la Canya 2_3 |
| 59c  | Vilars III_IV             |
| 71   | Coll del Moro             |
| 78   | Mas d'en Gual             |
| 7a   | Bosc del Congost          |
| 88   | Puig de Sant Andreu       |
| 89b  | Torre Roja                |
| 9b   | Ca n'Oliver 2_3           |

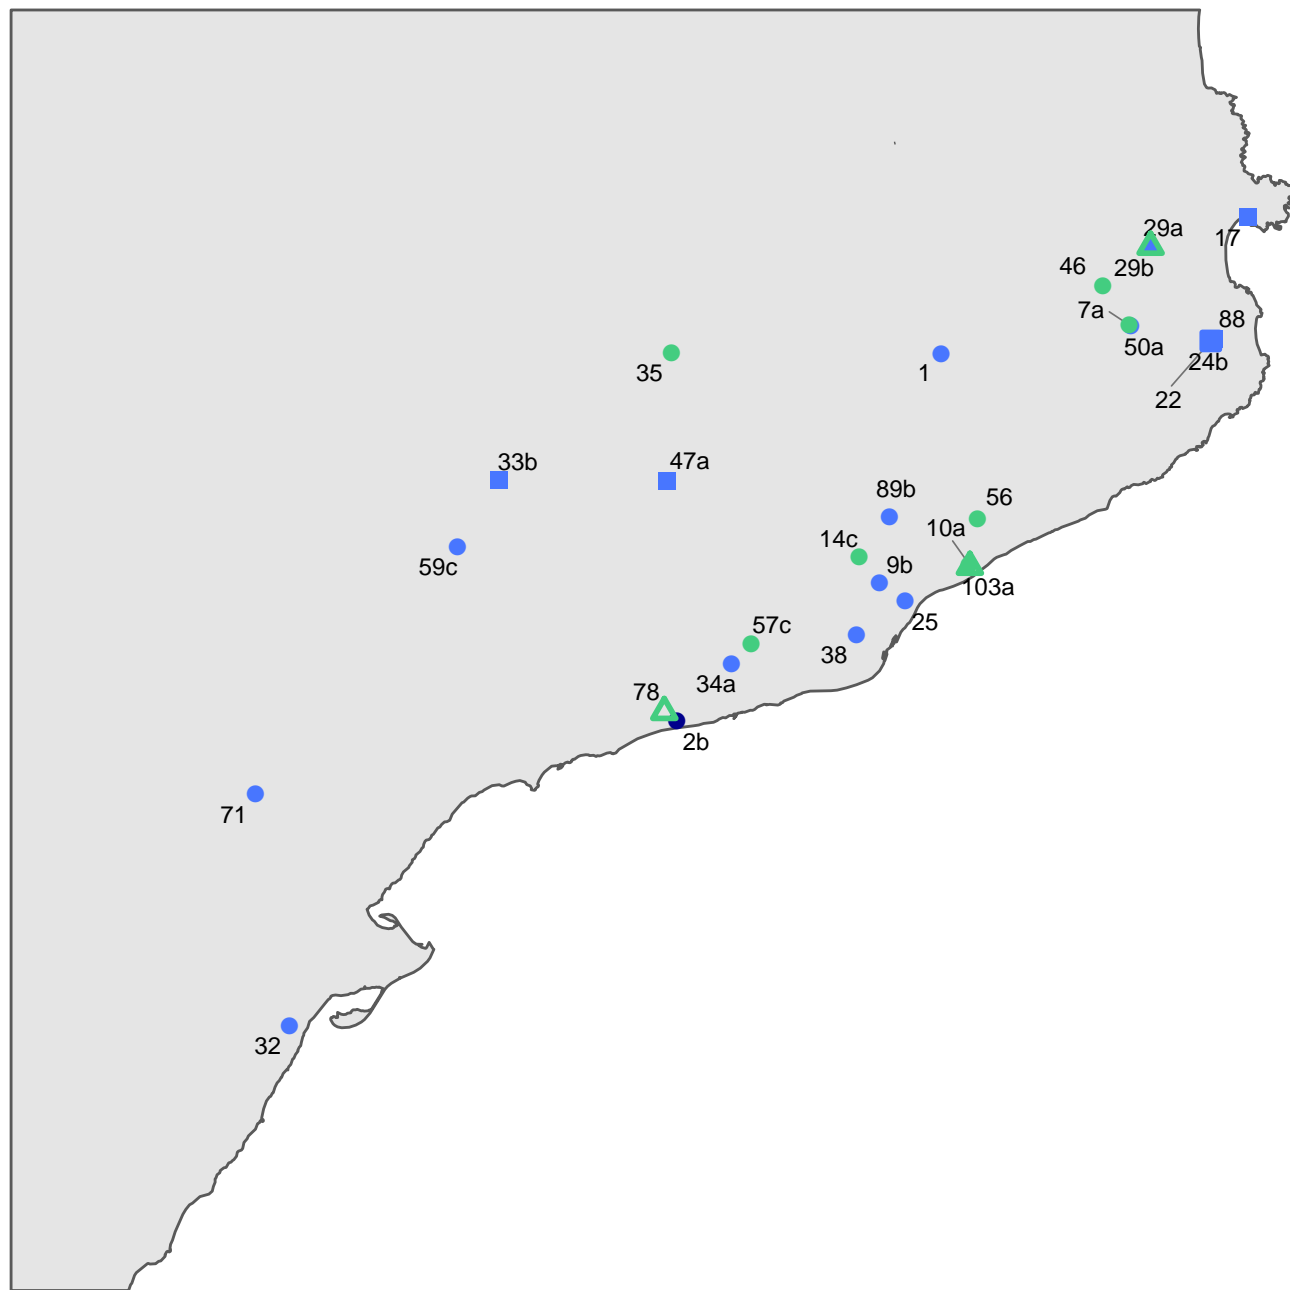

geographical.area

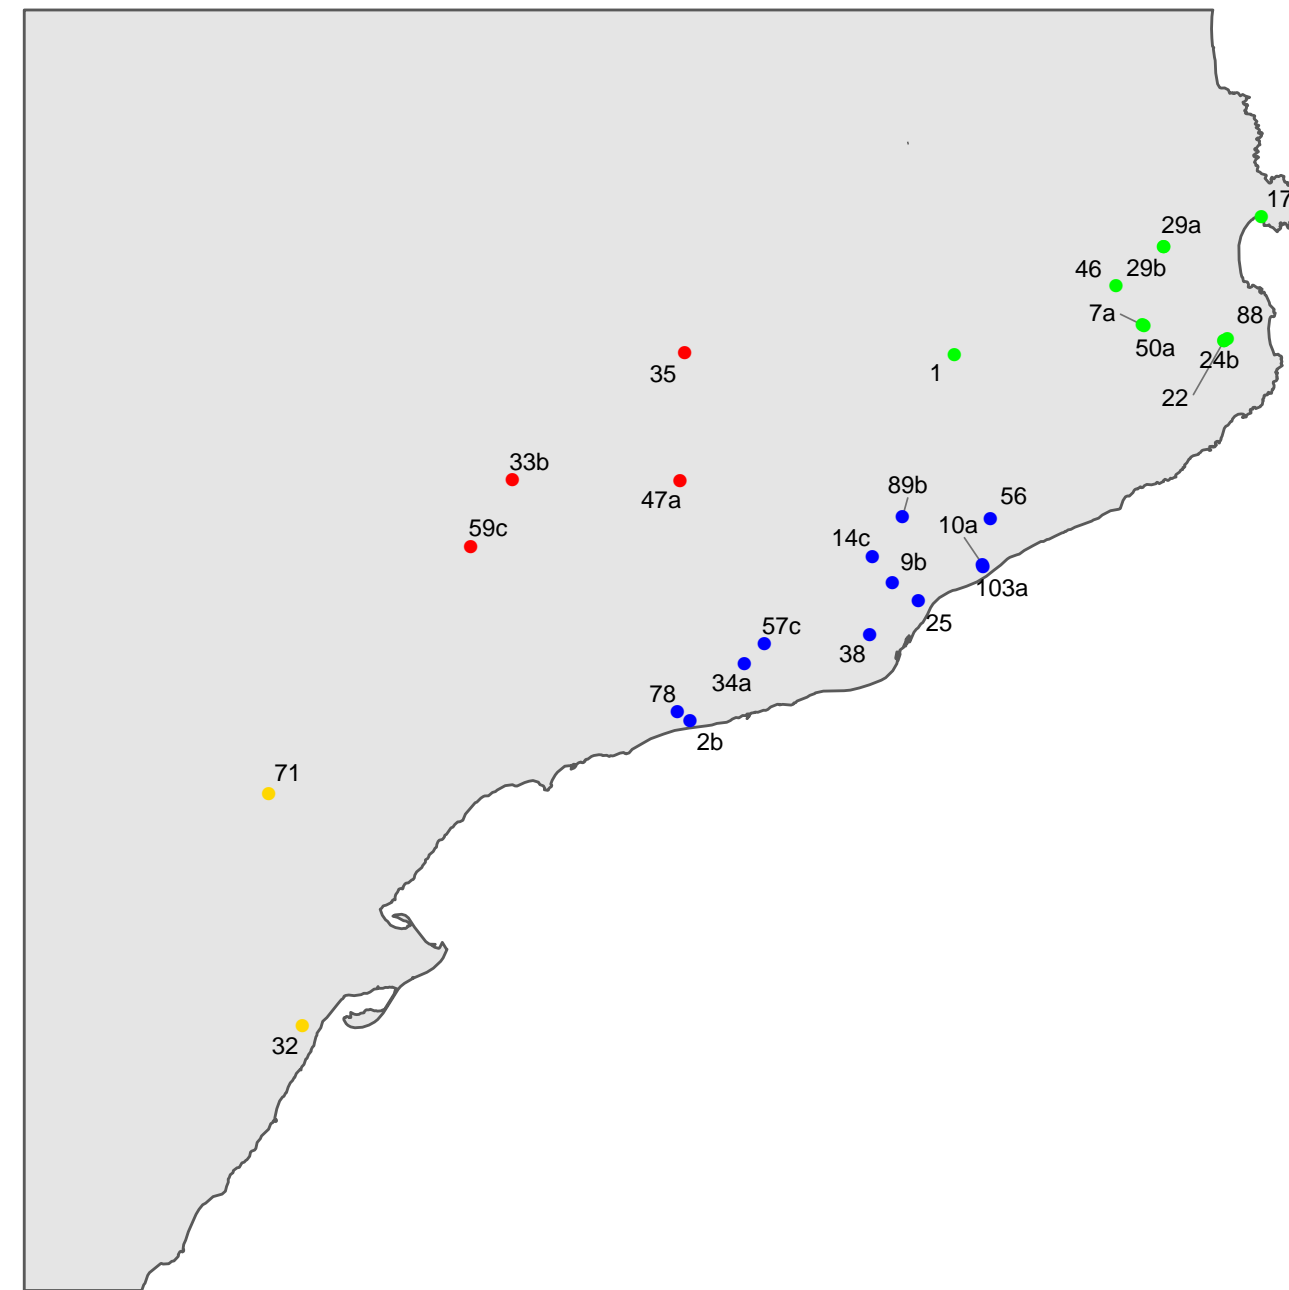

types and geographical areas of sites (n=23) during the 'RR' period

type.of.site

| num | Site                       |
|-----|----------------------------|
| 101 | Can Mateu                  |
| 102 | Can Bernat                 |
| 10b | Can Bartomeu               |
| 12b | Can Feu                    |
| 15d | Can Roqueta TR             |
| 23a | Ilerda                     |
| 29c | Mas Castellar              |
| 30  | Mas Guso                   |
| 34b | Olerdola 2                 |
| 36  | Olivet d en Pujol          |
| 41b | Sant Boi_PI Constitucio    |
| 44b | Sant Sebastia de la Guarda |
| 47b | Sigarra                    |
| 50b | St. Julia de Ramis         |
| 53  | Torre Cremada              |
| 58a | Vilarenc                   |
| 7b  | Bosc del Congost           |
| 8   | Burriac                    |
| 84  | Rosella                    |
| 87  | Puig Castellar Biosca      |
| 89c | Torre Roja                 |
| 91  | Hereuet                    |
| 92  | Missatges                  |

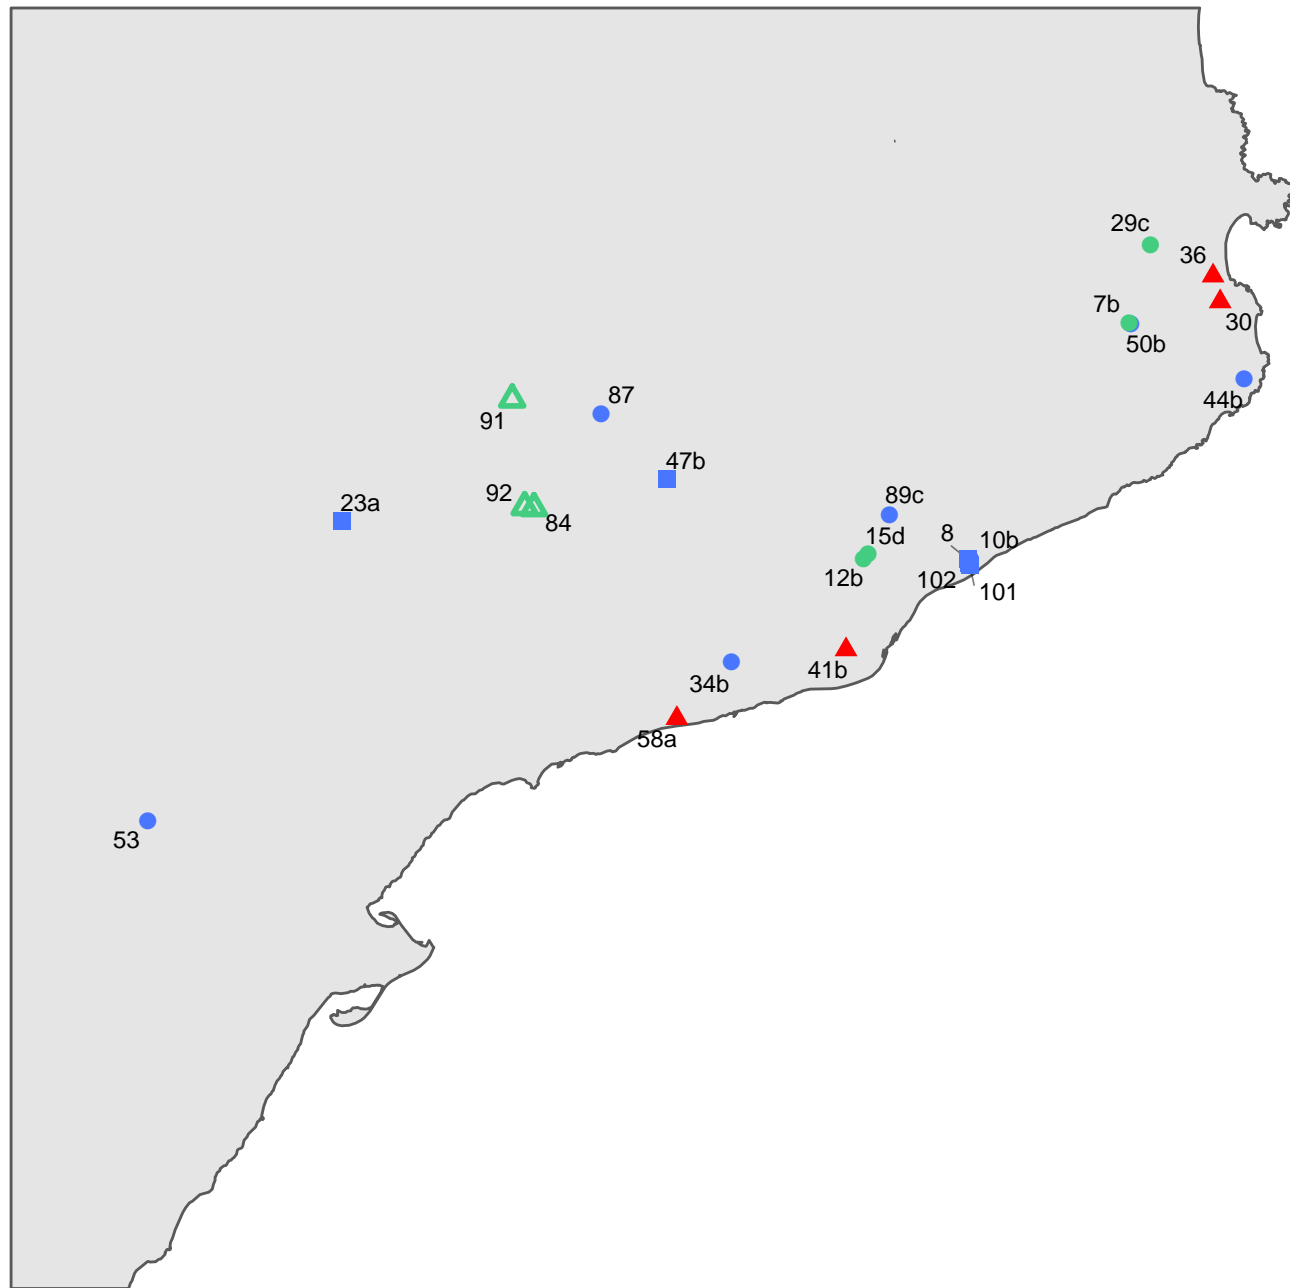

geographical.area

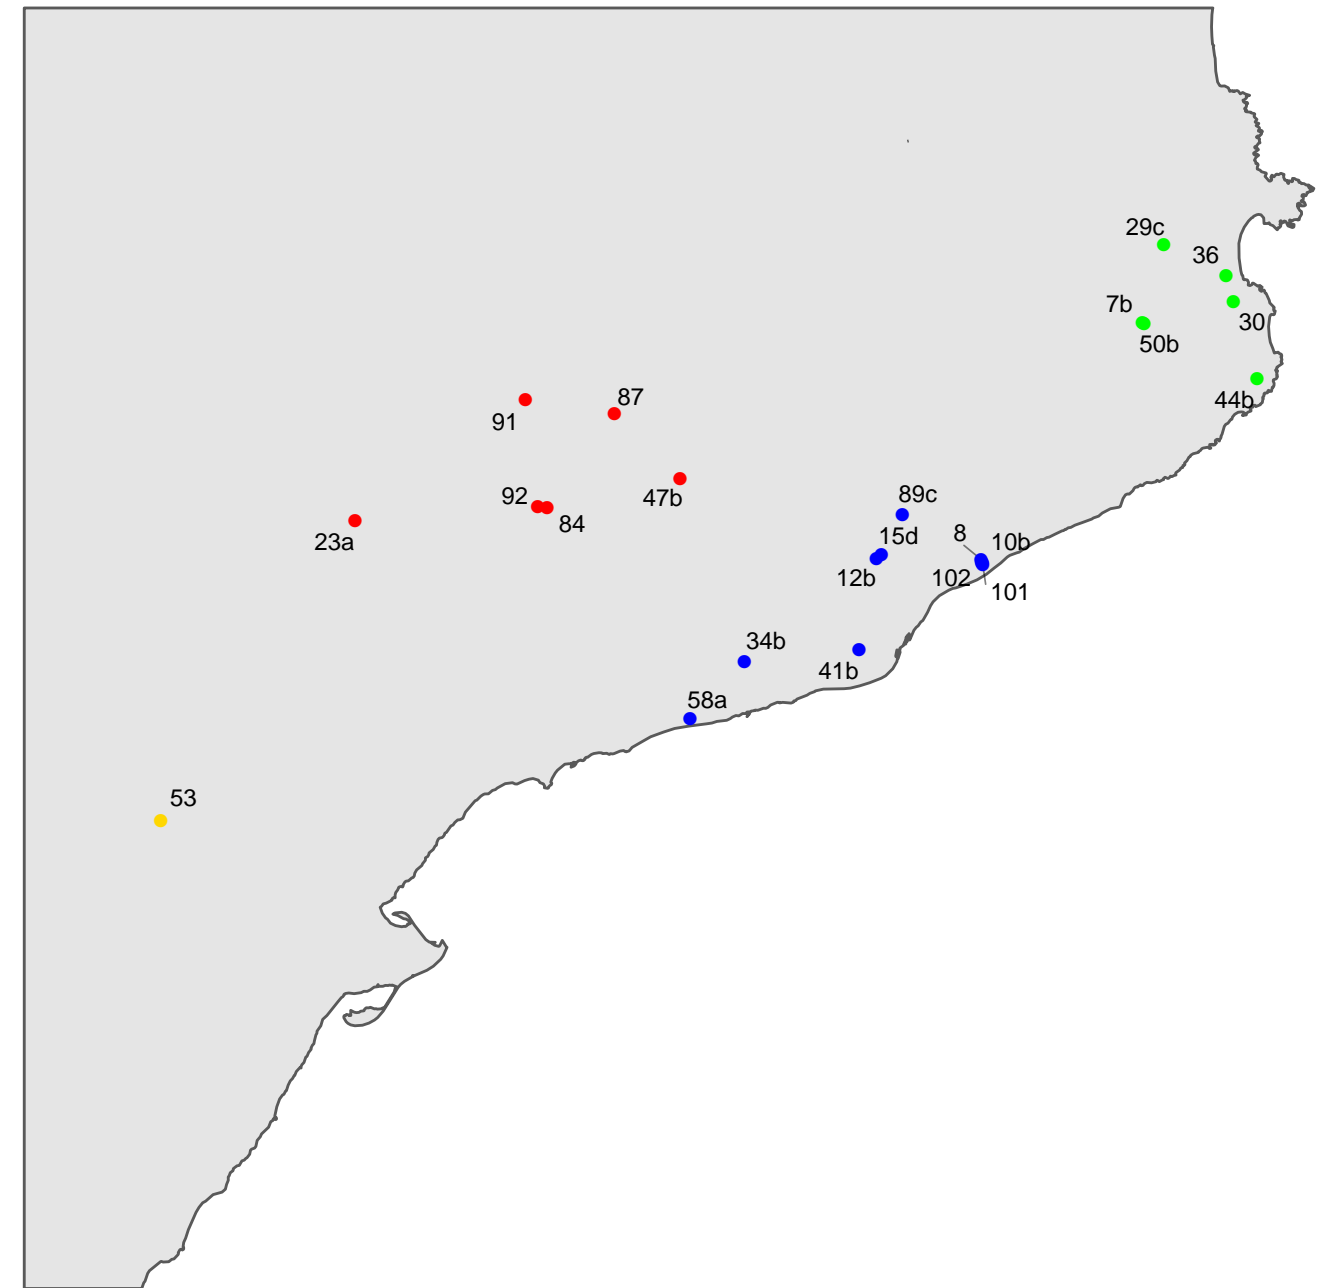

types and geographical areas of sites (n=18) during the 'ERE' period

type.of.site

geographical.area

| num  | Site                       |
|------|----------------------------|
| 103b | Can Rodon                  |
| 106  | Can Sant Joan              |
| 11b  | Can Cruzate                |
| 12a  | Can Feu                    |
| 19b  | Empuries                   |
| 23c  | Ilerda_Carrer Magdalena 47 |
| 23d  | Ilerda_Carrer Bafart 46    |
| 27a  | La Llosa                   |
| 3a   | Antigons_abocador          |
| 41c  | Sant Boi_PI Constitucio    |
| 5    | Baetulo                    |
| 52   | Tolegassos                 |
| 54a  | Torre Llauder              |
| 58b  | Vilarenc                   |
| 60a  | Vilauba                    |
| 61a  | Vil la Vinyet              |
| 94   | lesso                      |
| 95   | Vil la Torre Andreu        |

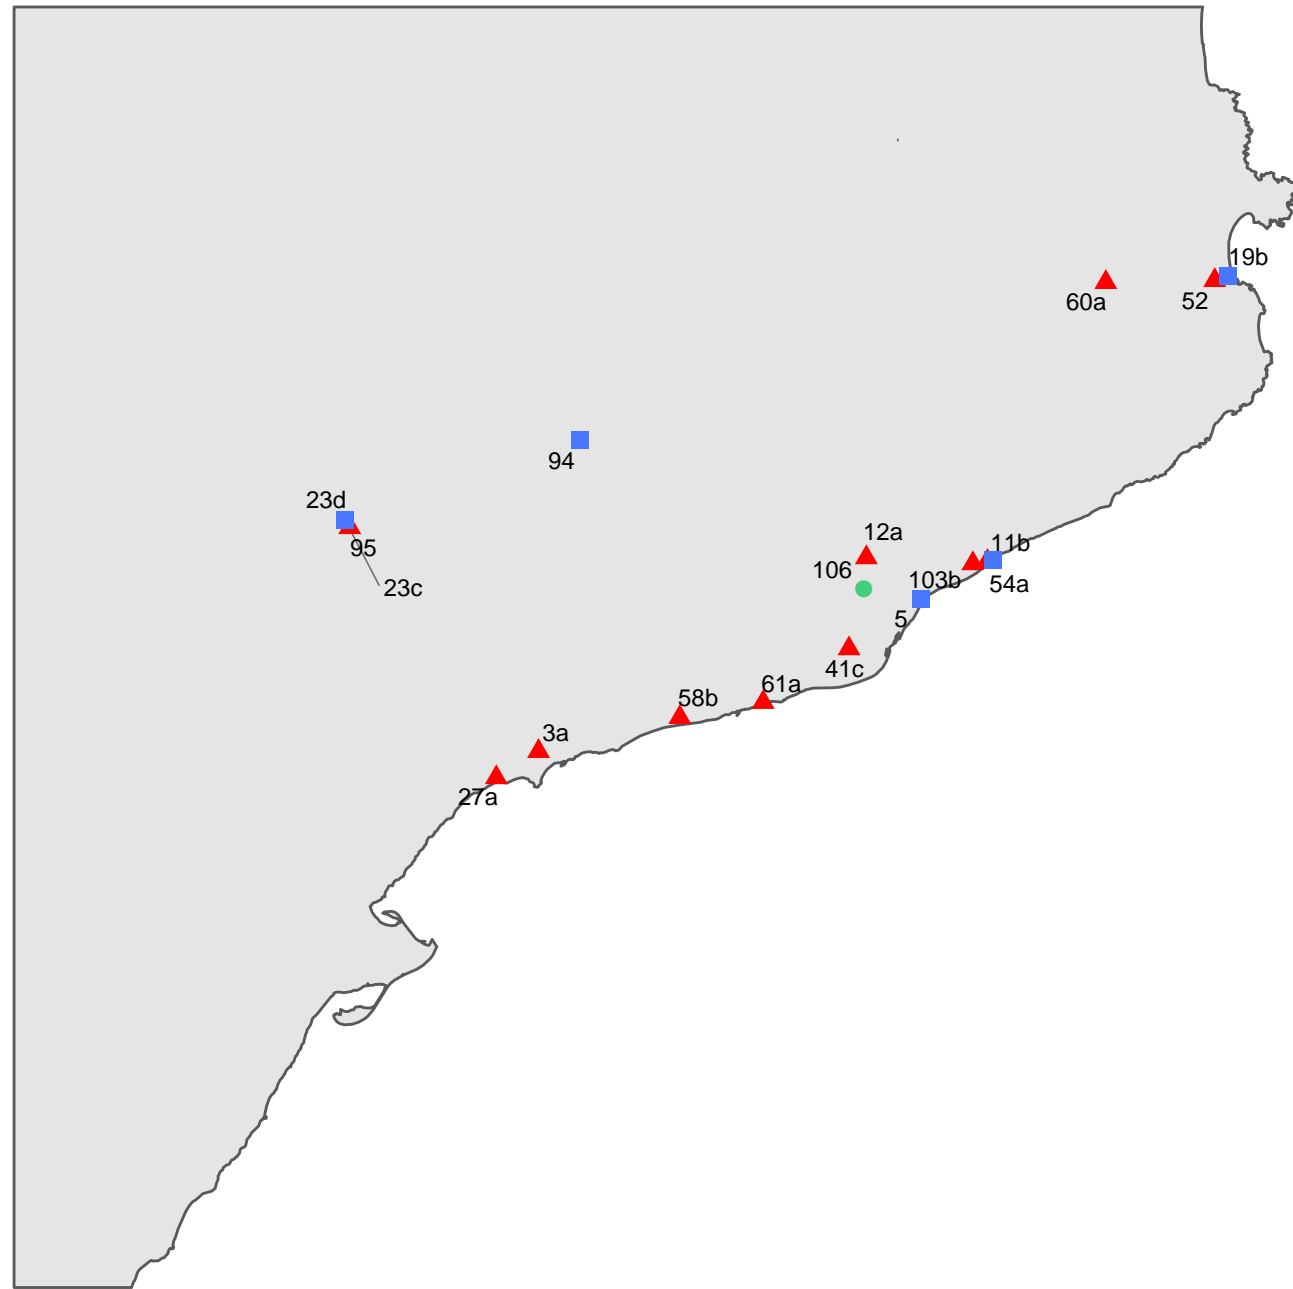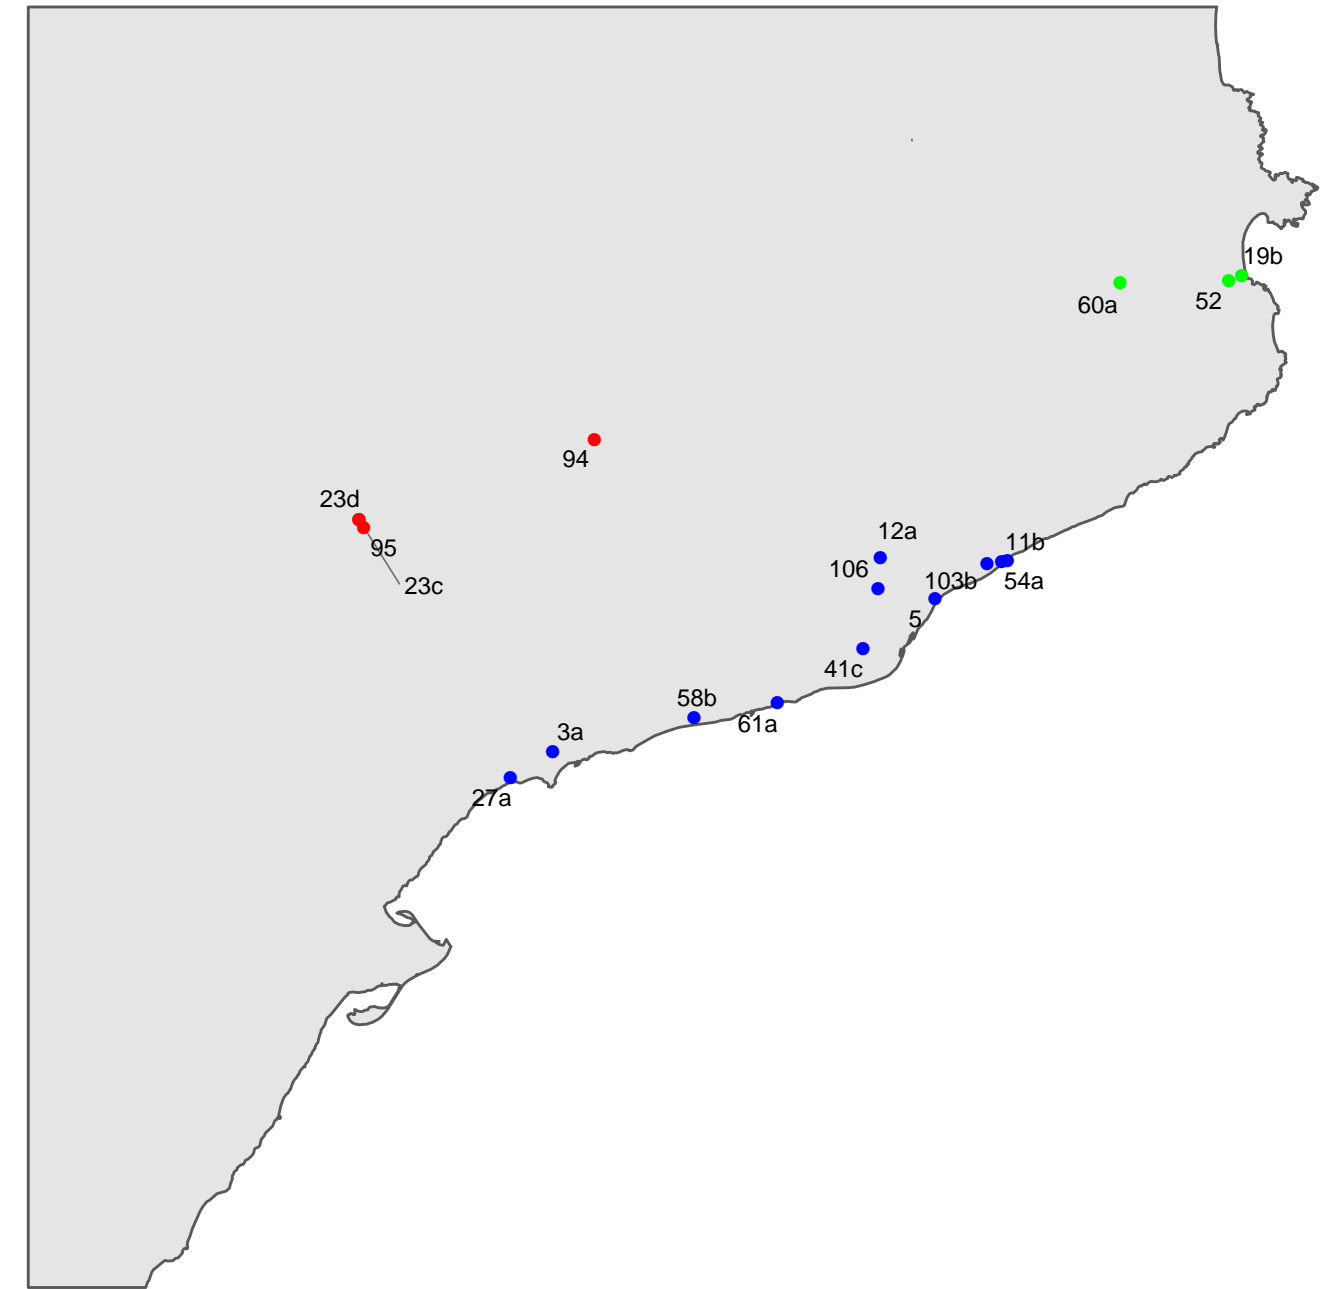

types and geographical areas of sites (n=10) during the 'LRE' period

type.of.site

geographical.area

| num | Site                    |
|-----|-------------------------|
| 11a | Can Cruzate             |
| 23b | Ilerda                  |
| 27b | La Llosa                |
| 3b  | Antigons_Nymphaeum      |
| 41d | Sant Boi_PI Constitucio |
| 51  | Tarraco                 |
| 54b | Torre Llauder           |
| 60b | Vilauba                 |
| 61b | Vil la del Vinyet       |
| 62  | Vil la dels Ametllers   |

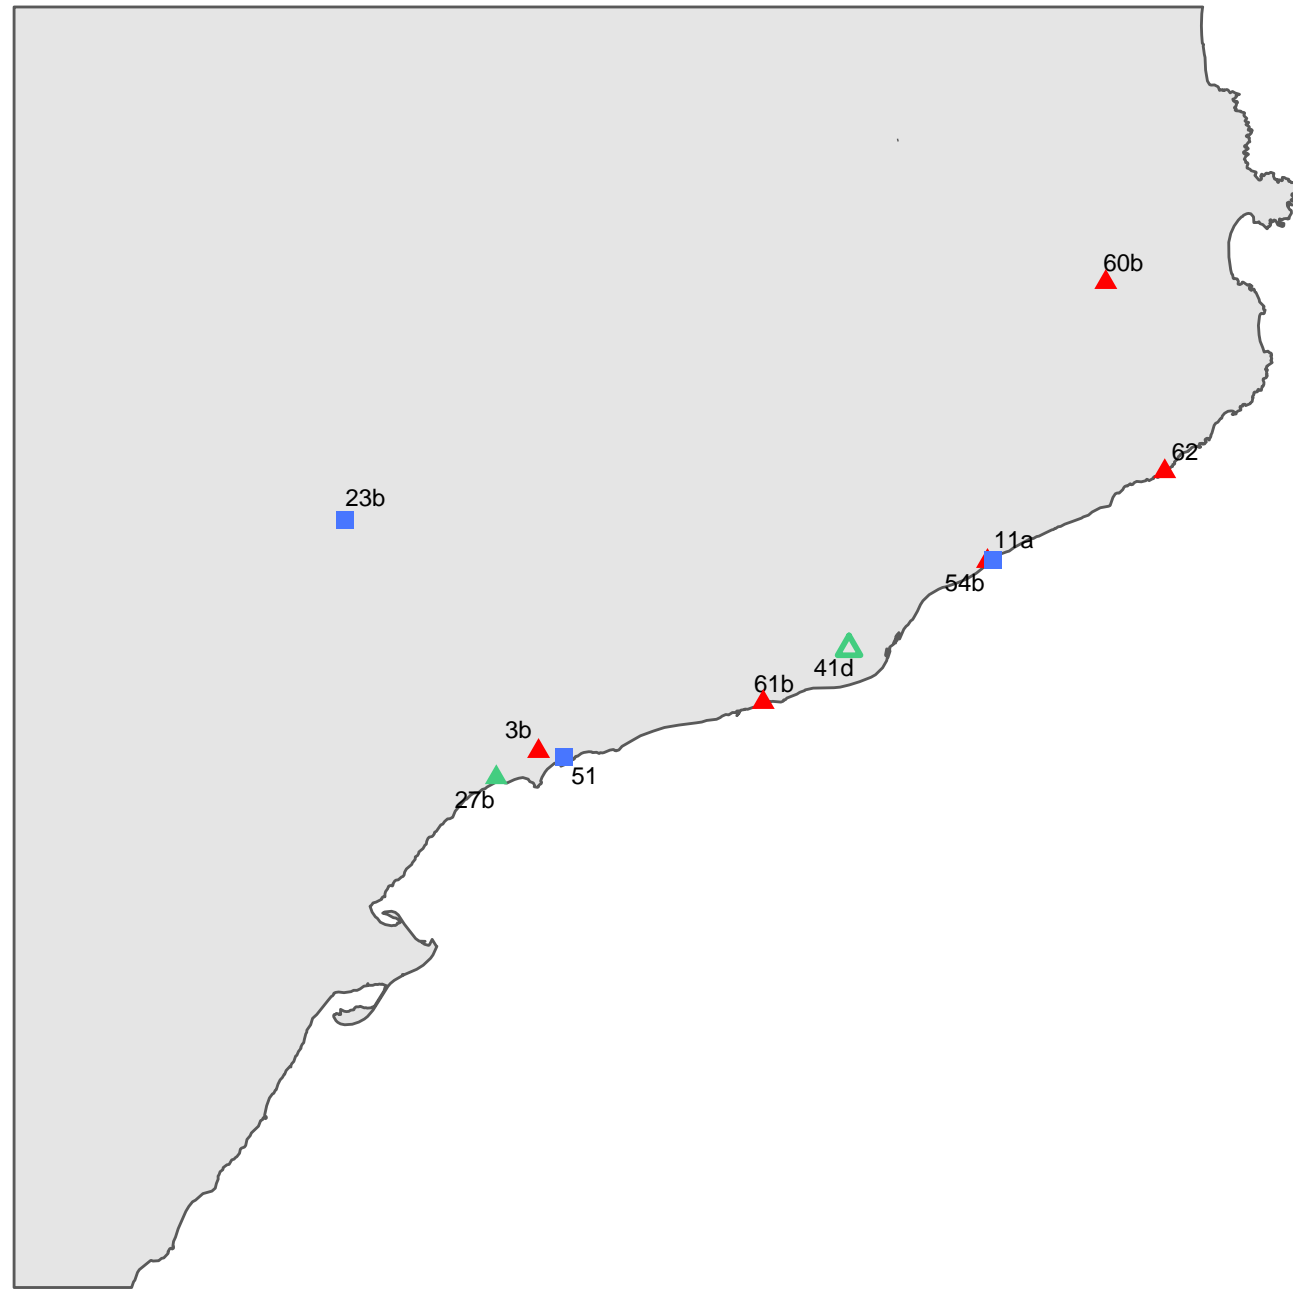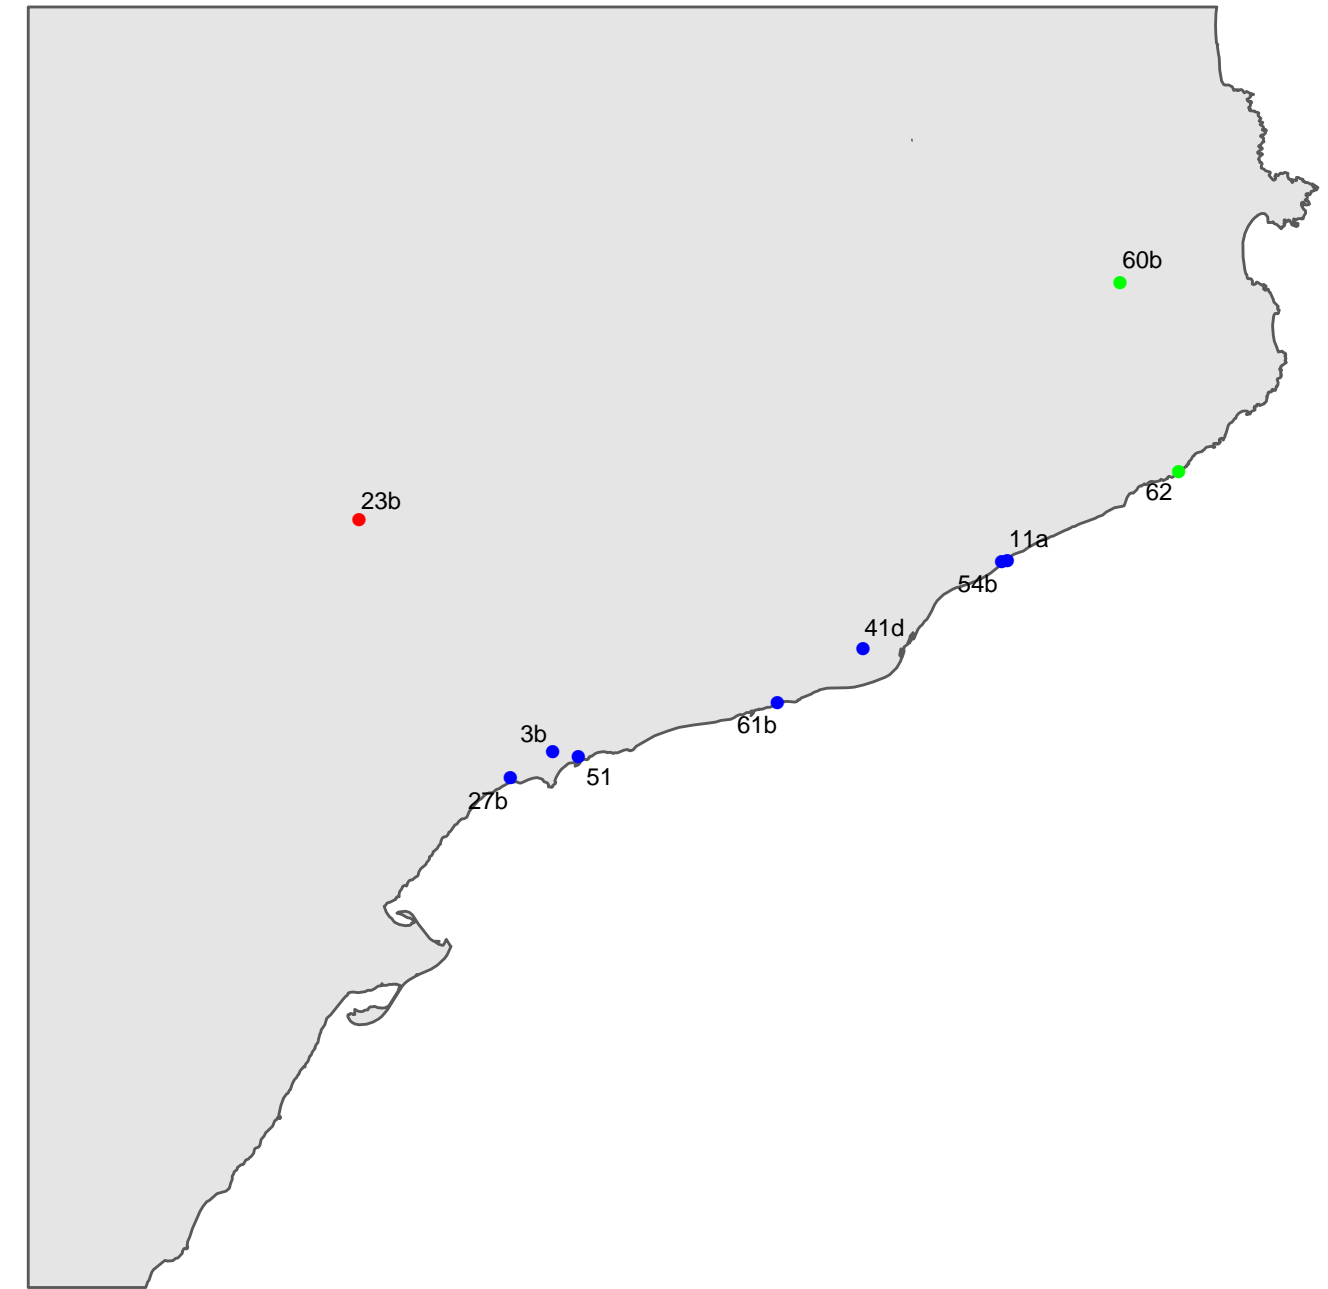

types and geographical areas of sites (n=11) during the 'LA' period

type.of.site

geographical.area

| num | Site                |
|-----|---------------------|
| 14d | Can Gambus 1        |
| 19c | Empuries            |
| 26  | Iluro_VI_VII        |
| 28  | Mallols             |
| 4   | Aubert              |
| 43d | Sant Marti Empuries |
| 45  | Santa Margarida     |
| 49  | Solana              |
| 54c | Torre Llauder       |
| 60c | Vilauba             |
| 97  | Vilans de Reig      |

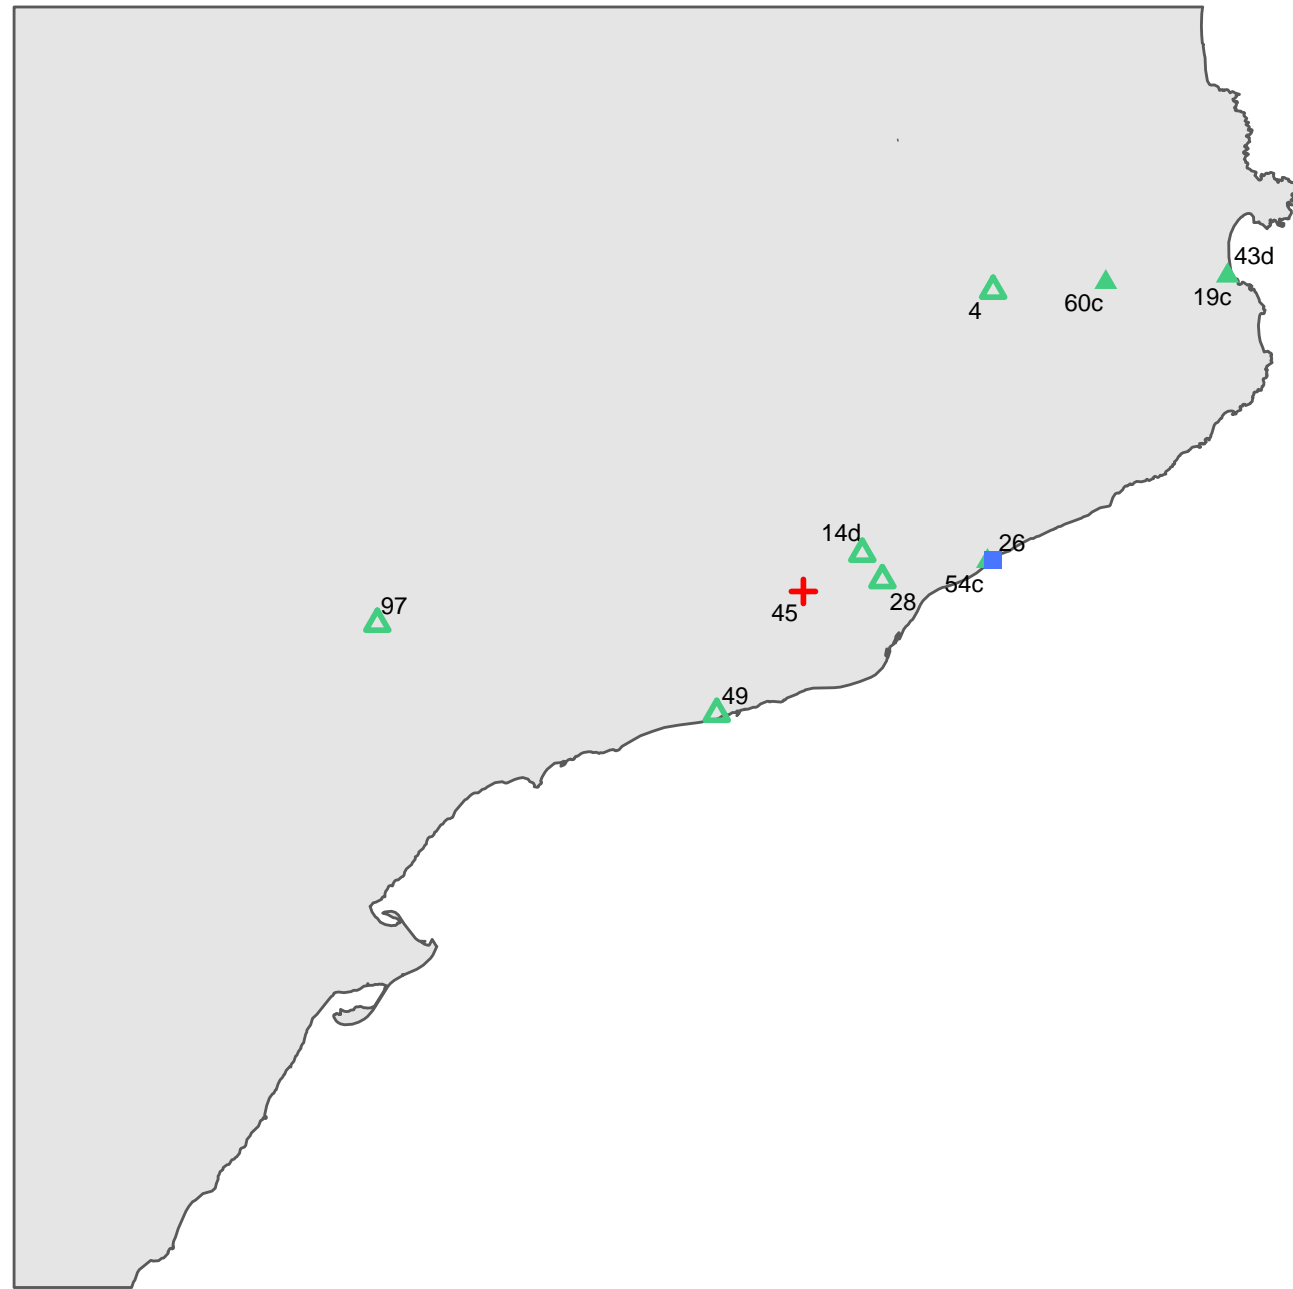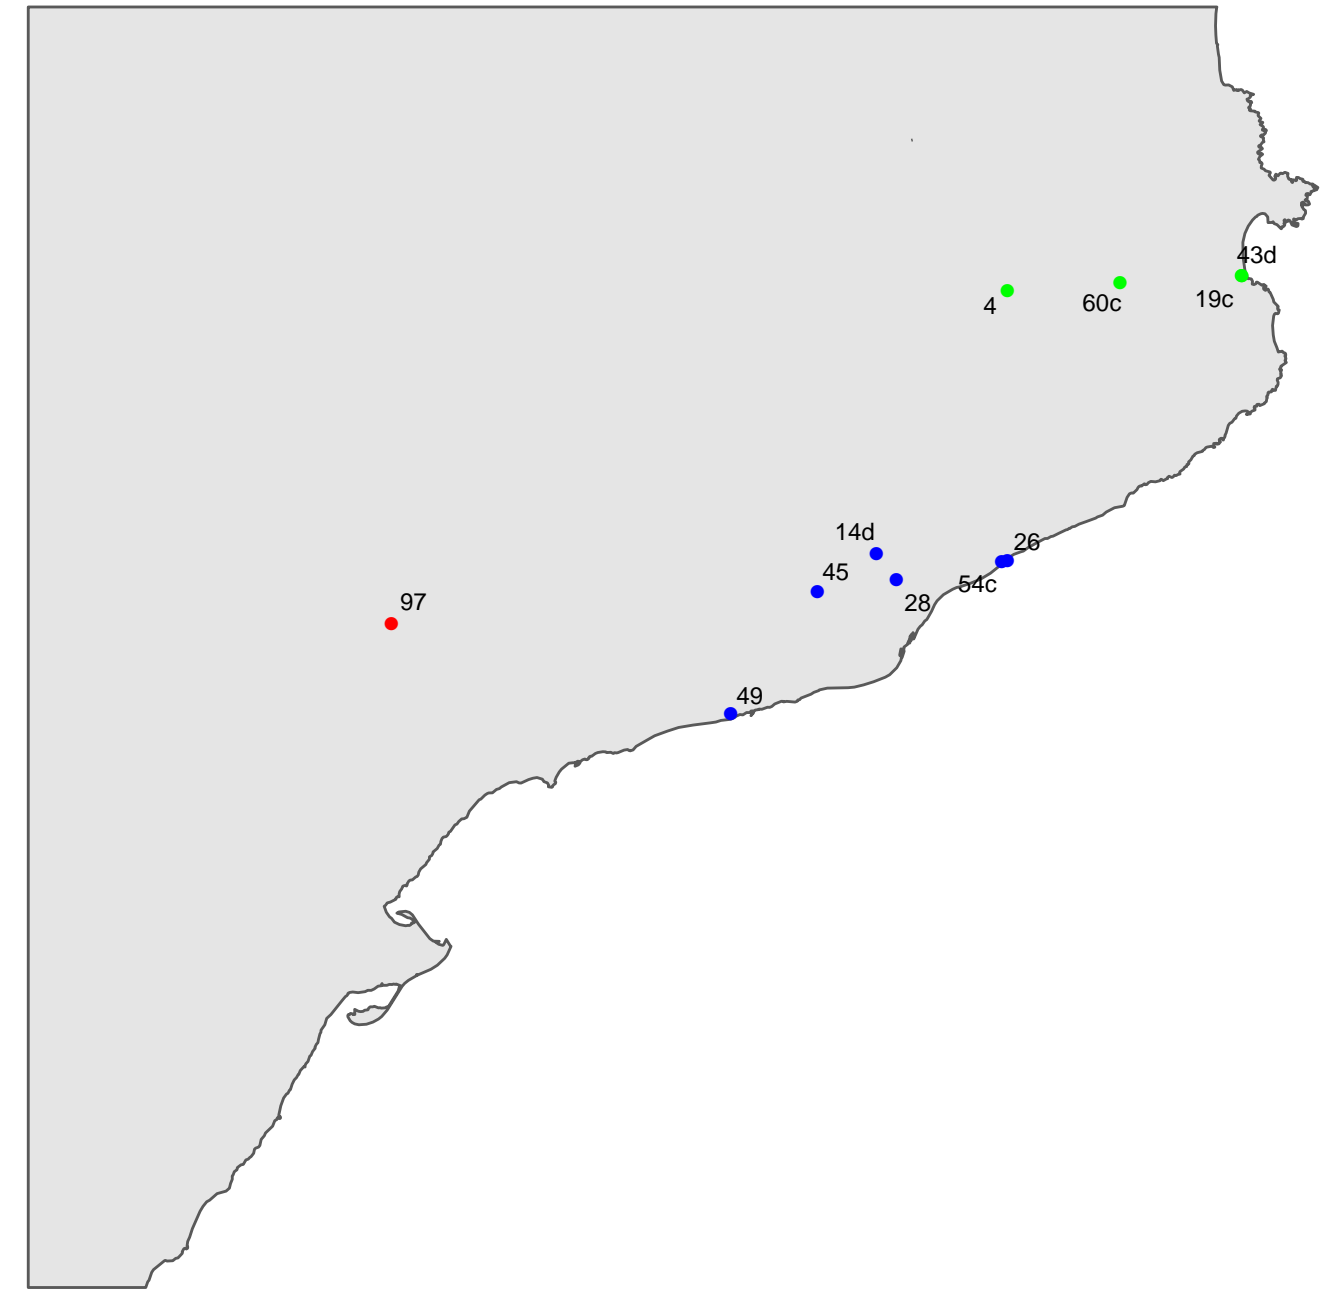

Supplement: pone.0246201.s003.pdf [file pone.0246201.s003.pdf]
