# Supplementary material for: Resilience and livestock adaptations to demographic growth and technological change: A diachronic perspective from the Late Bronze Age to Late Antiquity in NE Iberia
Source: PubMed Central journal article supplement (PMC7888671; doi:10.1371/journal.pone.0246201), 2021-02-17

MIA1 BOTA Length

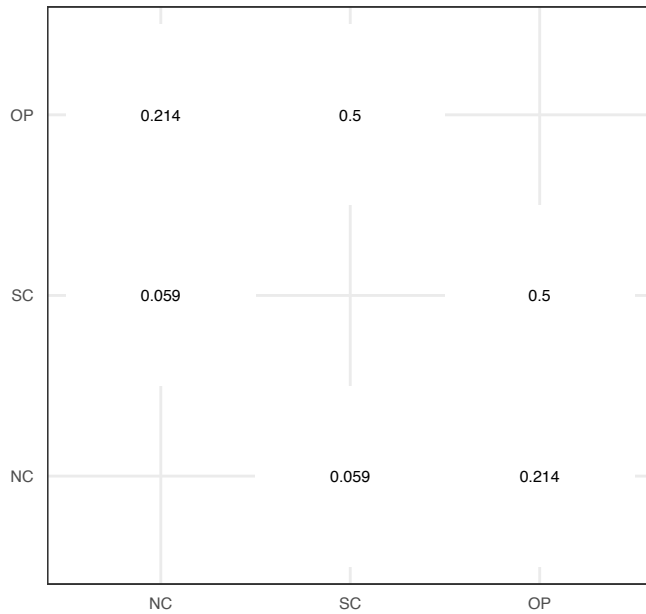

MIA1 BOTA Width

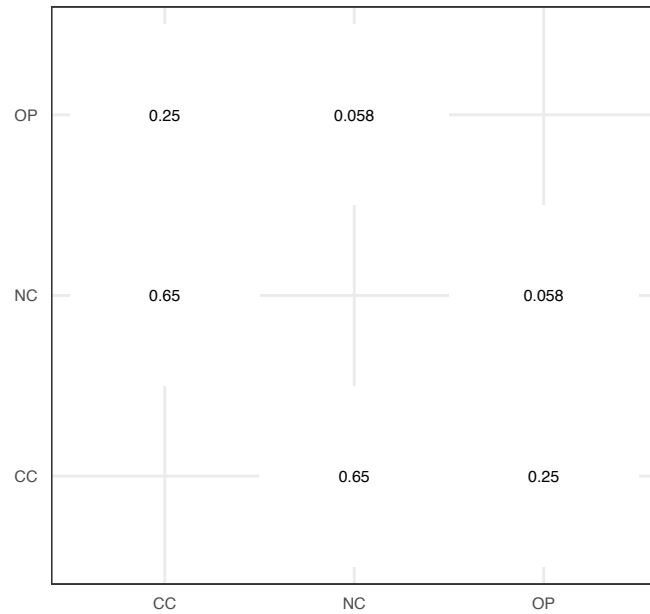

MIA1 OC Length

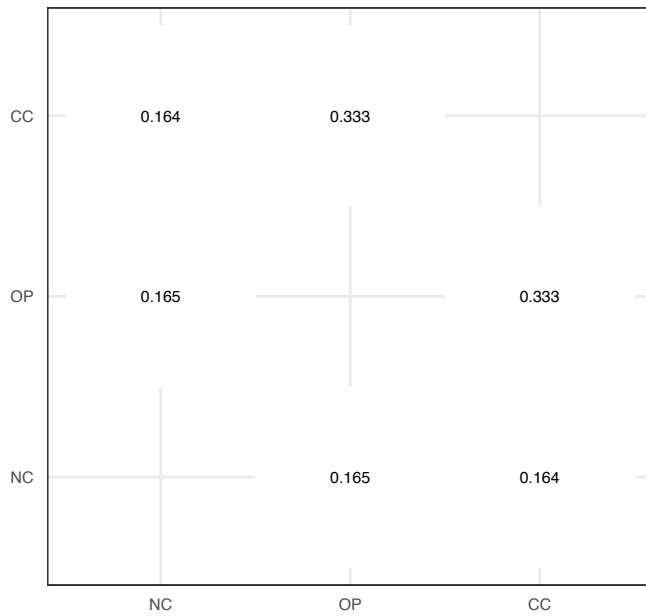

MIA1 OC Width

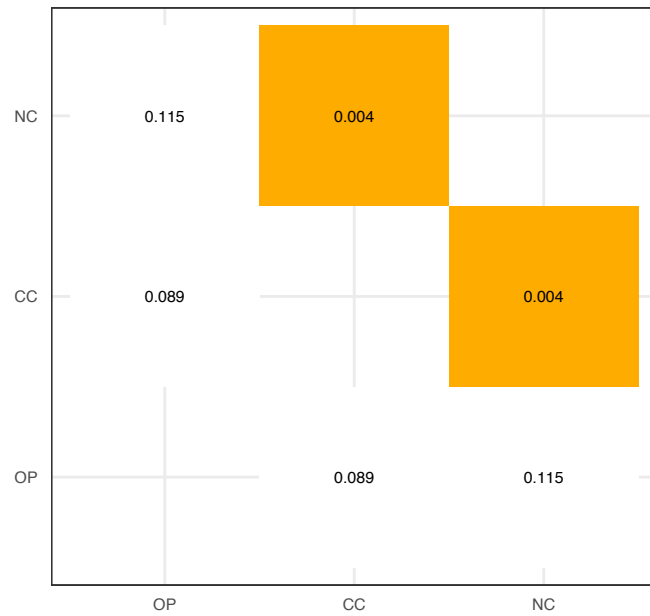

MIA2 BOTA Length

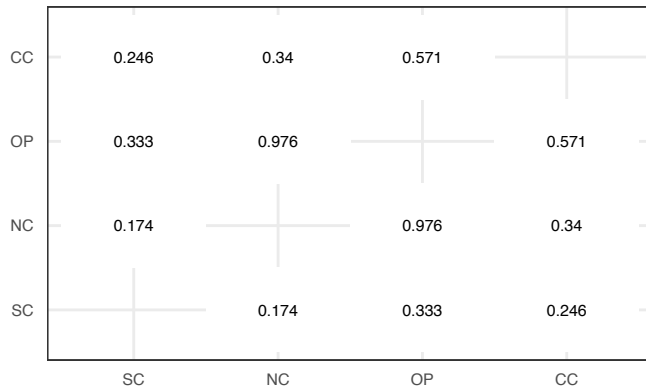

MIA2 BOTA Width

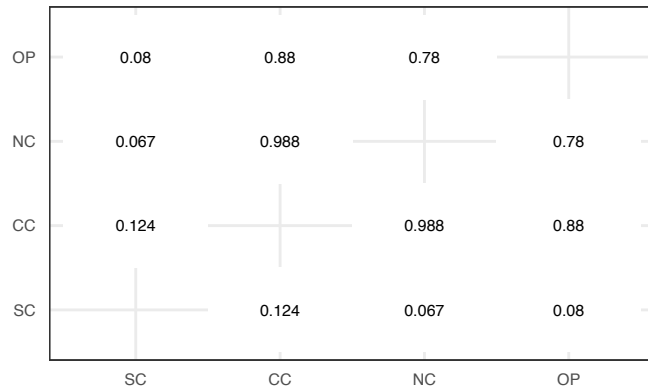

MIA2 SUDO Length

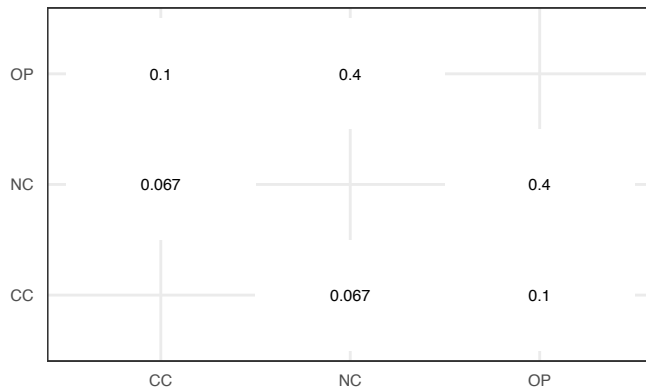

MIA2 SUDO Width

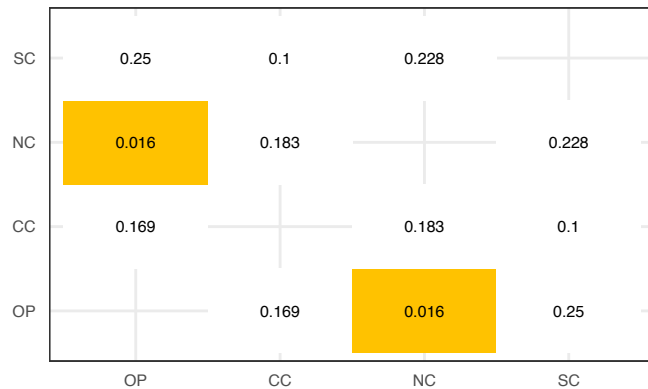

MIA2 OC Length

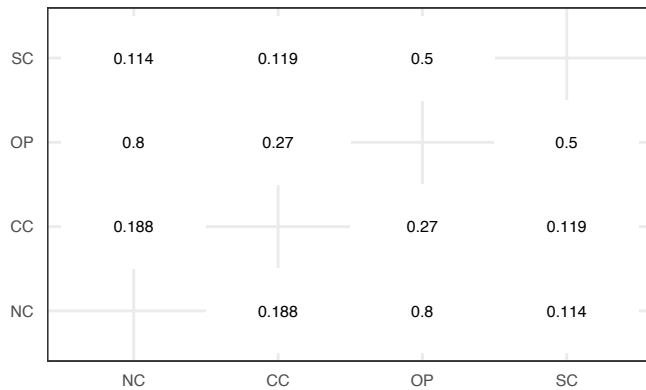

MIA2 OC Width

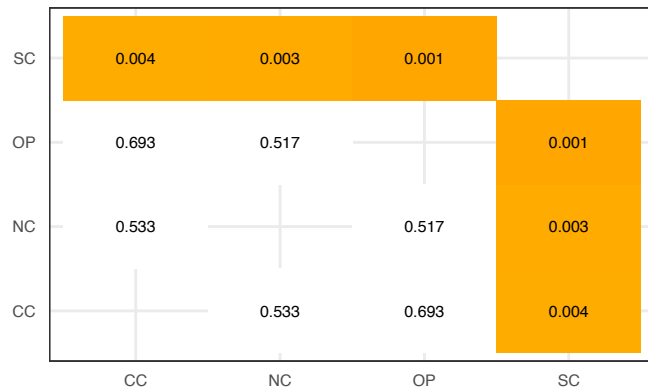

RR BOTA Length

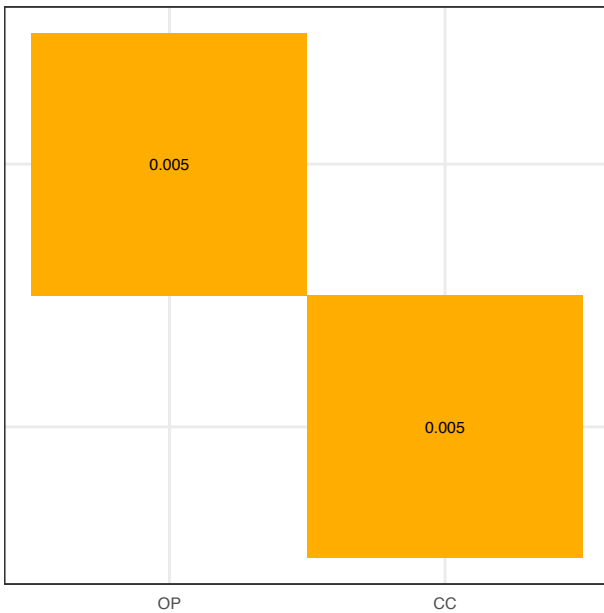

RR BOTA Width

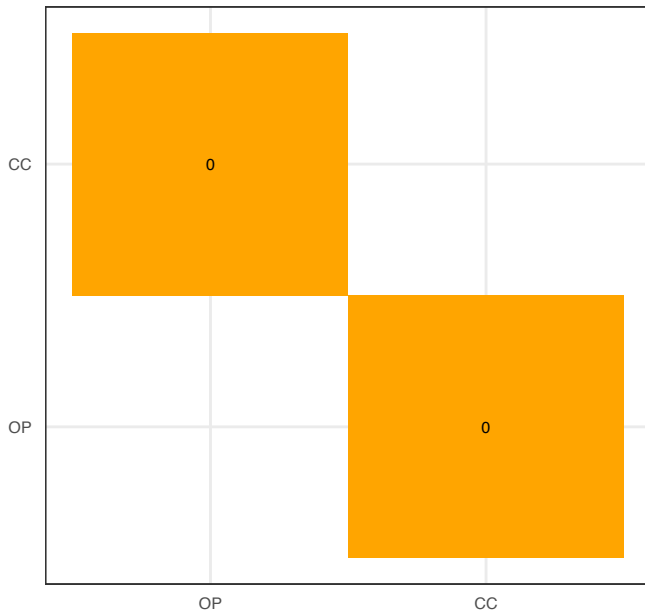

RR OC Length

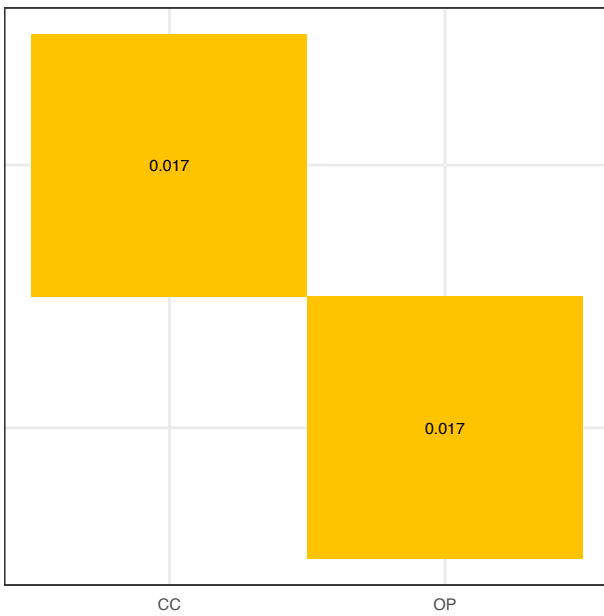

RR OC Width

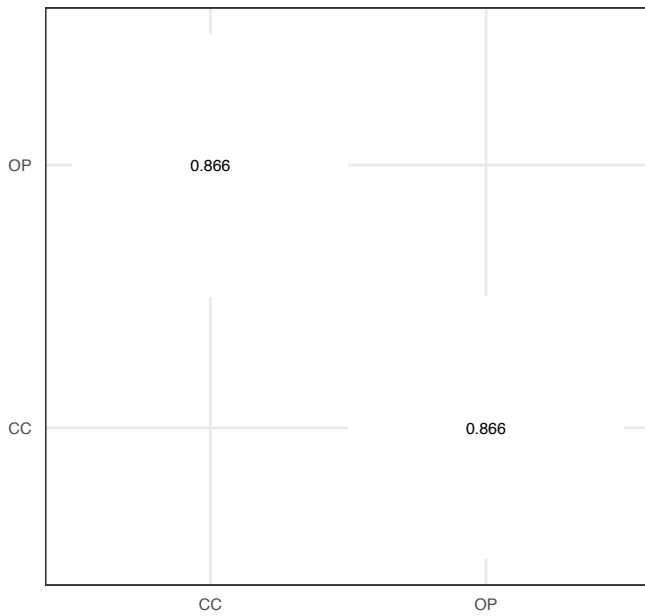

ERE BOTA Length

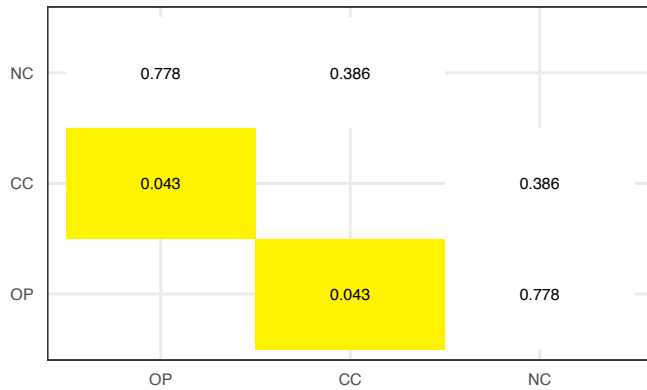

ERE BOTA Width

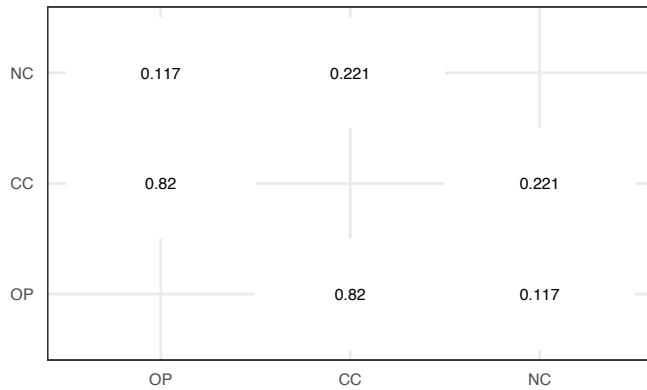

ERE SUDO Length

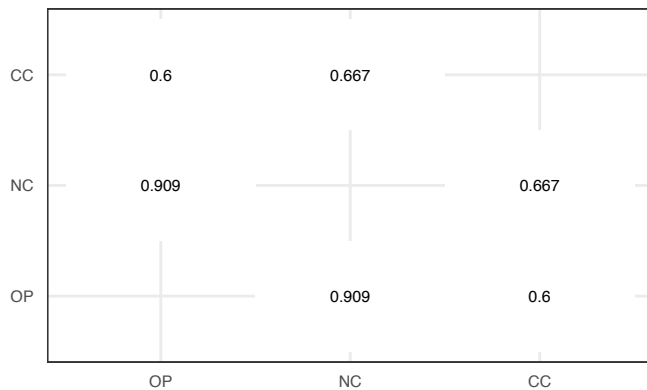

ERE SUDO Width

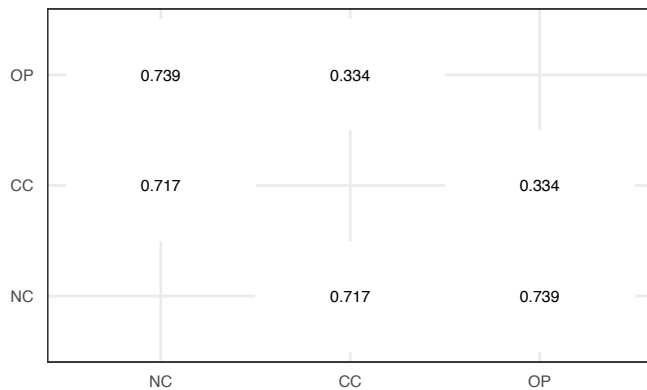

ERE OC Length

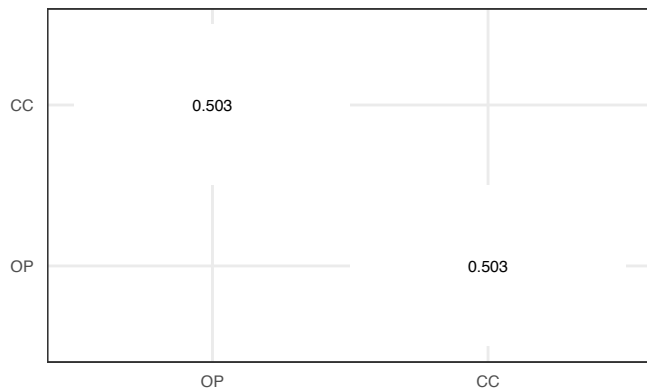

ERE OC Width

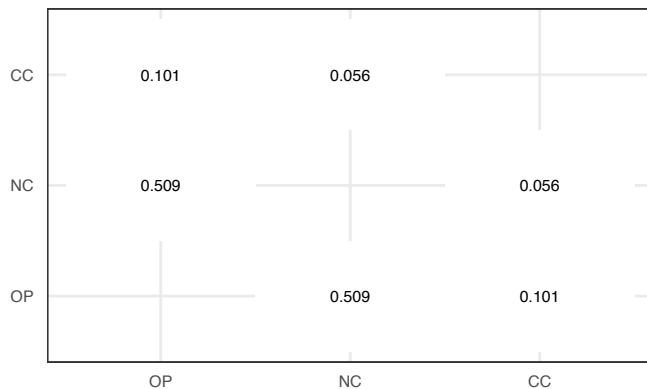

LRE BOTA Length

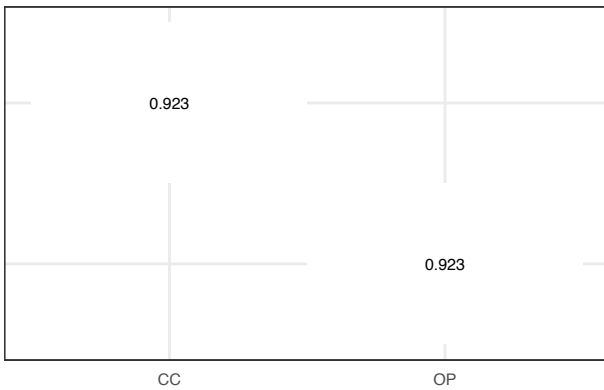

LRE BOTA Width

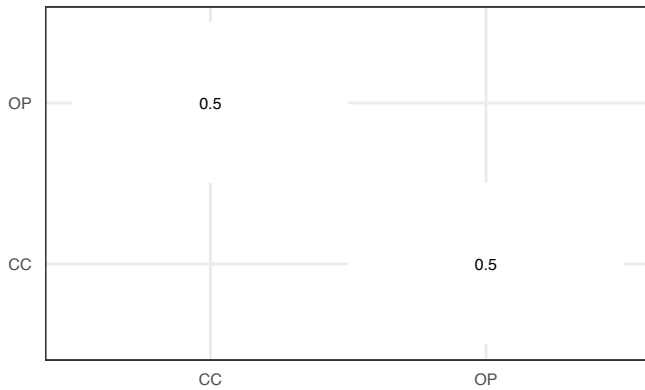

LRE SUDO Length

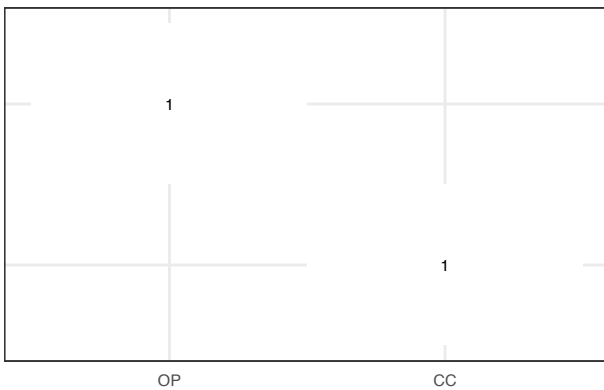

LRE SUDO Width

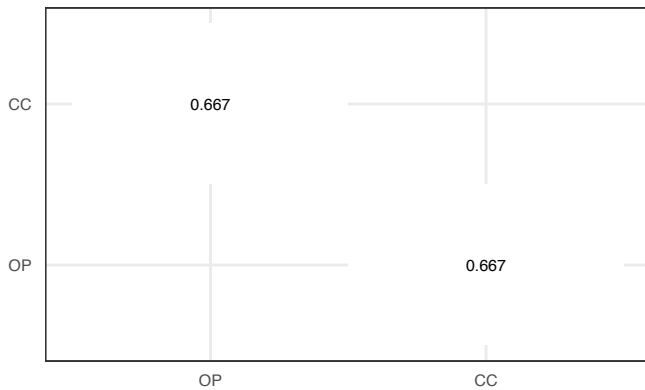

LRE OC Length

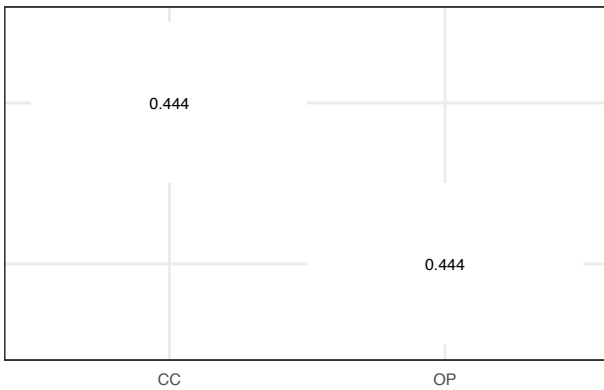

LRE OC Width

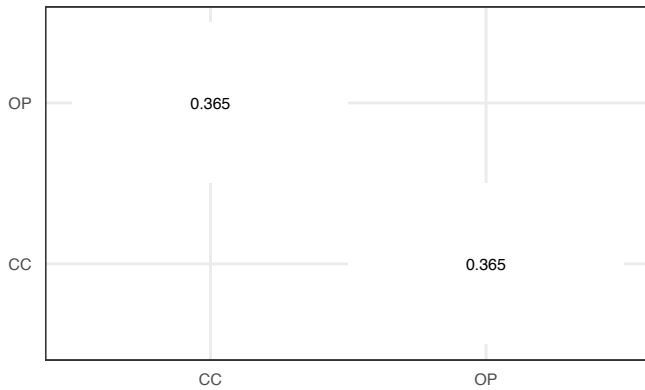

LA BOTA Length

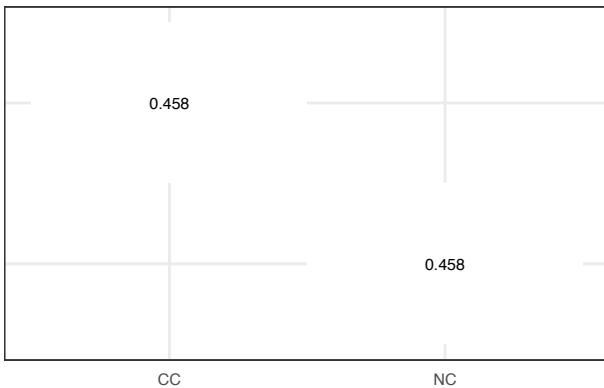

LA BOTA Width

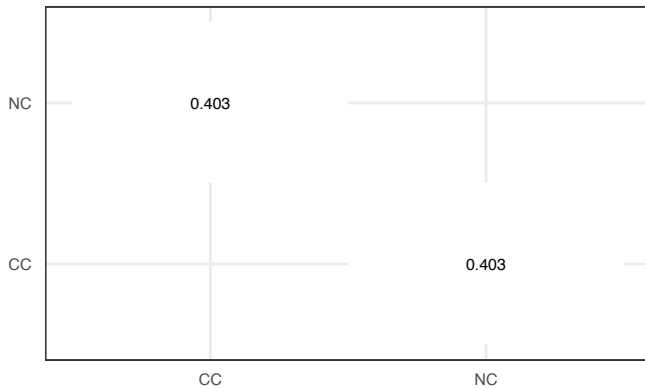

LA SUDO Length

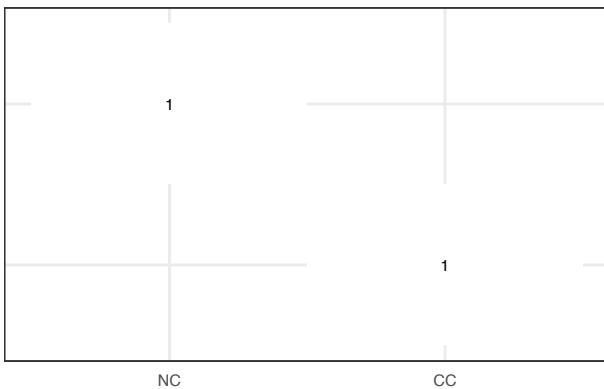

LA SUDO Width

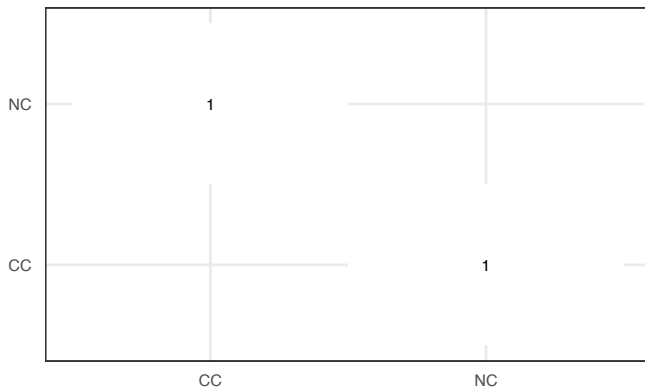

LA OC Length

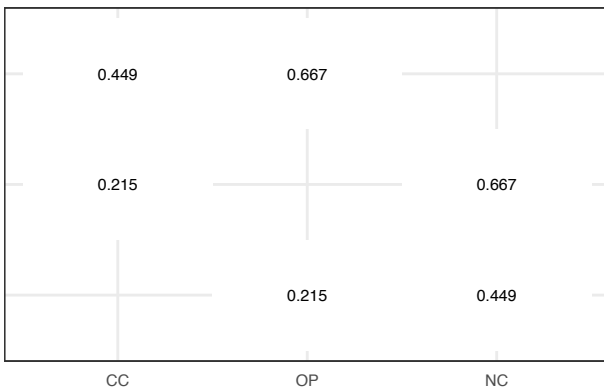

LA OC Width

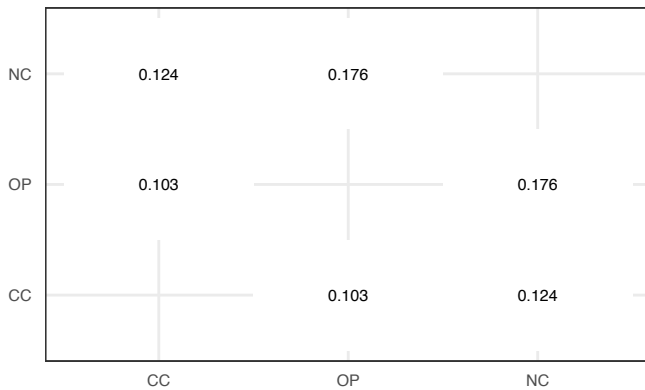

Supplement: pone.0246201.s008.pdf [file pone.0246201.s008.pdf]
