# Supplementary material for: Resilience and livestock adaptations to demographic growth and technological change: A diachronic perspective from the Late Bronze Age to Late Antiquity in NE Iberia
Source: PubMed Central journal article supplement (PMC7888671; doi:10.1371/journal.pone.0246201), 2021-02-17
Supplement: pone.0246201.s002.pdf [file pone.0246201.s002.pdf]

**Table of data set for the sites cited in the text**

ZooMWest ERC-StG project

| Zone | Period | Site names                               | num  | Type of site                     | Ab   | NISP | References                                  |
|------|--------|------------------------------------------|------|----------------------------------|------|------|---------------------------------------------|
| OP   | LBA    | <b>Carretelà</b>                         | 16   | Closed settlement                | CS   | 393  | Albizuri & Colomer, 2001-2002               |
| OP   | LBA    | <b>Vilot de Montagut 0-III</b>           | 63   | Open settlement                  | OS   | 324  | Gómez, 2000                                 |
| OP   | LBA    | <b>Vincament</b>                         | 64   | Closed settlement                | CS   | 106  | Nieto, 2002                                 |
| OP   | LBA    | <b>Zafranales</b>                        | 65   | Closed settlement                | CS   | 532  | Castaños, 1988                              |
| OP   | LBA    | <b>Cova Punta Farisa</b>                 | 18   | Shelter                          | S    | 176  | Albizuri & Nadal, 1993                      |
| CC   | LBA    | <b>Can Roqueta CRV</b>                   | 15a  | Scattered village with silos     | SVS  | 316  | Albizuri, 2008                              |
| CC   | LBA    | <b>Can Roqueta TR</b>                    | 15b  | Scattered village with silos     | SVS  | 310  | Piña & Saña, 2004                           |
| CC   | LBA    | <b>Can Gambús 3</b>                      | 14a  | Scattered village with silos     | SVS  | 106  | Orri, 2005-2006                             |
| NC   | LBA    | <b>Sant Martí Empúries</b>               | 43a  | Scattered village                | SV   | 137  | Casellas, 1999a                             |
| NC   | LBA    | <b>Fonollera</b>                         | 21   | Scattered village                | SV   | 1315 | Estévez,1997; Colomer, 1989; Albizuri, 2018 |
| OP   | EIA    | <b>La Pedrera IV-VII</b>                 | 37   | Fortified settlement             | FS   | 343  | Miró, 1989a                                 |
| OP   | EIA    | <b>Tossal Molinet I-II</b>               | 55a  | Open settlement                  | OS   | 560  | Gómez, 2000                                 |
| OP   | EIA    | <b>Vilars 0-I</b>                        | 59a  | Fortified settlement             | FS   | 627  | Miró, 1992; Nieto Espinet, 2012             |
| SC   | EIA    | <b>Puig de la Misericordia</b>           | 39   | Fortified settlement             | FS   | 854  | Castaños, 1994                              |
| SC   | EIA    | <b>Puig de la Nau</b>                    | 40a  | Fortified settlement             | FS   | 321  | Castaños,1995                               |
| SC   | EIA    | <b>Barranc de Gàfols_1</b>               | 6a   | Scattered village                | SV   | 166  | Albizuri & Nadal, 1999                      |
| SC   | EIA    | <b>Sant Jaume Mas d'en Serra_sect. 1</b> | 42   | Aristocratic residence           | AR   | 394  | Font, 2016                                  |
| SC   | EIA    | <b>Barranc de Gàfols_2</b>               | 6b   | Open settlement                  | OS   | 1101 | Albizuri & Nadal, 1999                      |
| CC   | EIA    | <b>Sitges UAB</b>                        | 48   | Scattered village with silos     | SVS  | 98   | Albizuri et al.,1985; Albizuri et al., 2010 |
| CC   | EIA    | <b>Can Roqueta_DIASA</b>                 | 15c  | Scattered village with silos     | SVS  | 307  | Casellas et al. 1999                        |
| CC   | EIA    | <b>Turo Font de la Canya 0</b>           | 57a  | Silo field                       | SF   | 208  | Valenzuela Lamas, 2008                      |
| CC   | EIA    | <b>Mas d en Boixos</b>                   | 90a  | Silo field                       | SF   | *    | Nieto Espinet et al. 2019                   |
| NC   | EIA    | <b>Sant Martí Empúries</b>               | 43b  | Silo field                       | SF   | 1073 | Casellas, 1999a; Albizuri, 2018             |
| OP   | MIA1   | <b>Tossal Molinet III</b>                | 55b  | Open settlement                  | OS   | 220  | Gómez, 2000                                 |
| OP   | MIA1   | <b>Vilars II</b>                         | 59b  | Fortified settlement             | FS   | 2968 | Miró, 1992; Nieto Espinet, 2012             |
| OP   | MIA1   | <b>Molí Espígol</b>                      | 33a  | Urban                            | U    | *    | Valenzuela Lamas & Nieto Espinet, 2020a     |
| SC   | MIA1   | <b>Puig de la Nau</b>                    | 40b  | Fortified settlement             | FS   | 3106 | Castaños, 1995                              |
| CC   | MIA1   | <b>Can Gambús 3</b>                      | 14b  | Silo field                       | SF   | 168  | Orri, 2005-2006                             |
| CC   | MIA1   | <b>Alorda Park 2a</b>                    | 2a   | Aristocratic residence           | AR   | 509  | Valenzuela Lamas, 2008                      |
| CC   | MIA1   | <b>Turó Font de la Canya 1</b>           | 57b  | Silo field                       | SF   | 232  | Valenzuela Lamas, 2008                      |
| CC   | MIA1   | <b>Ca n'Oliver 1</b>                     | 9a   | Fortified settlement             | FS   | 332  | Albizuri, 1990; Albizuri et al. 2010        |
| CC   | MIA1   | <b>Torre Roja</b>                        | 89a  | Fortified settlement             | FS   | *    | Valenzuela Lamas, 2008                      |
| NC   | MIA1   | <b>Sant Sebastià de la Guarda</b>        | 44a  | Fortified settlement             | FS   | 3997 | Colominas, 2017                             |
| NC   | MIA1   | <b>Illa d'en Reixac 2-3</b>              | 24a  | Urban                            | U    | 131  | Casellas, 1999b                             |
| NC   | MIA1   | <b>Sant Martí Empúries</b>               | 43c  | Open settlement                  | OS   | 338  | Casellas, 1999a                             |
| CC   | MIA1   | <b>Mas d'en Boixos</b>                   | 90b  | Silo field                       | SF   | *    | Nieto Espinet et al. 2019                   |
| OP   | MIA2   | <b>Vilars III-IV</b>                     | 59c  | Fortified settlement             | FS   | 110  | Miró,1992; Nieto Espinet, 2012              |
| OP   | MIA2   | <b>Molí d'Espígol</b>                    | 33b  | Urban                            | U    | 2280 | Colominas, 2017                             |
| OP   | MIA2   | <b>Sigarra</b>                           | 47a  | Urban                            | U    | 563  | Nieto Espinet, 2014                         |
| OP   | MIA2   | <b>Olius</b>                             | 35   | Silo field                       | SF   | 1535 | Colominas et al., 2017b                     |
| SC   | MIA2   | <b>Moleta del Remei 1_2</b>              | 32   | Fortified settlement             | FS   | 1364 | Albizuri & Nadal, 1991                      |
| SC   | MIA2   | <b>Coll del Moro</b>                     | 71   | Fortified settlement             | FS   | *    | Font 2016                                   |
| CC   | MIA2   | <b>Mas d'en Gual</b>                     | 78   | Rural settlement with silo field | RSSF | *    | Valenzuela Lamas et al. 2010                |
| CC   | MIA2   | <b>Can Rodon</b>                         | 103a | Rural settlement with silo field | RSSF | *    | Valenzuela-Lamas & Nieto Espinet, 2020      |
| CC   | MIA2   | <b>Alorda Park 2b</b>                    | 2b   | Aristocratic residence           | AR   | 692  | Valenzuela Lamas, 2008                      |
| CC   | MIA2   | <b>Penya del Moro</b>                    | 38   | Fortified settlement             | FS   | 1136 | Miró & Molist, 1982                         |
| CC   | MIA2   | <b>Can Bartomeu</b>                      | 10a  | Silo field                       | SF   | 1061 | Valenzuela Lamas & Nieto Espinet, 2019      |
| CC   | MIA2   | <b>Olèrdola 1</b>                        | 34a  | Fortified settlement             | FS   | 123  | Valenzuela Lamas, 2008                      |
| CC   | MIA2   | <b>Torre Roja</b>                        | 89b  | Fortified settlement             | FS   | *    | Valenzuela Lamas, 2008                      |
| CC   | MIA2   | <b>Puig Castellar</b>                    | 25   | Fortified settlement             | FS   | *    | Nadal & Estrada, 2003                       |
| CC   | MIA2   | <b>Turó del Vent 1-2</b>                 | 56   | Silo field                       | SF   | 1814 | Oliva,1998; Oliva, 2000                     |
| CC   | MIA2   | <b>Can Gambús 1</b>                      | 14c  | Silo field                       | SF   | *    | Molina Vallmitjana, 2006                    |

|    |      |                                   |      |                                  |      |      |                                                          |
|----|------|-----------------------------------|------|----------------------------------|------|------|----------------------------------------------------------|
| CC | MIA2 | <b>Turó Font de la Canya 2-3</b>  | 57c  | Silo field                       | SF   | 586  | Valenzuela Lamas, 2008                                   |
| CC | MIA2 | <b>Ca n Oliver 2-3</b>            | 9b   | Fortified settlement             | FS   | 1939 | Albizuri, 1990; Albizuri et al. 2010                     |
| CC | MIA2 | <b>Turó de la Rovira</b>          | 13   | Fortified settlement             | FS   | 932  | Colominas, 2019                                          |
| NC | MIA2 | <b>Mas Castellar fortified</b>    | 29a  | Fortified settlement             | FS   | 2033 | Colominas, 2013a                                         |
| NC | MIA2 | <b>Ciutadella de Roses</b>        | 17   | Urban                            | U    | 180  | Montero, 2000                                            |
| NC | MIA2 | <b>Gou Battle</b>                 | 22   | Periurban                        | PU   | 639  | Valenzuela Lamas et al., 2017                            |
| NC | MIA2 | <b>Illa d'en Reixac 4-6</b>       | 24b  | Urban                            | U    | 2467 | Casellas, 1999b                                          |
| NC | MIA2 | <b>St. Julià de Ramis</b>         | 50a  | Fortified settlement             | FS   | 510  | Colominas et al. 2017                                    |
| NC | MIA2 | <b>Bosc del Congost</b>           | 7a   | Silo field                       | SF   | 108  | Colominas & Saña, 2009a; Colominas & Saña, 2009b         |
| NC | MIA2 | <b>Saus</b>                       | 46   | Silo field                       | SF   | 434  | Colominas et al. 2017                                    |
| NC | MIA2 | <b>Puig de Sant Andreu</b>        | 88   | Urban                            | U    | *    | Valenzuela Lamas, 2017                                   |
| NC | MIA2 | <b>Mas Castellar rural</b>        | 29b  | Rural settlement with silo field | RSSF | 904  | Colominas, 2013                                          |
| NC | MIA2 | <b>Esquerda</b>                   | 1    | Fortified settlement             | FS   | 394  | Buxó & Martí, 1994                                       |
| OP | RR   | <b>Sigarra</b>                    | 47b  | Urban                            | U    | 172  | Nieto Espinet, 2014                                      |
| OP | RR   | <b>Rosella</b>                    | 84   | Rural settlement with silo field | RSSF | *    | Nieto Espinet, 2013                                      |
| OP | RR   | <b>Puig Castellar Biosca</b>      | 87   | Fortified settlement             | FS   | *    | Valenzuela Lamas & Padrós, 2010                          |
| OP | RR   | <b>Hereuet</b>                    | 91   | Rural settlement with silo field | RSSF | *    | Valenzuela Lamas & Padrós, 2010                          |
| OP | RR   | <b>Missatges</b>                  | 92   | Rural settlement with silo field | RSSF | *    | Font, 2016                                               |
| OP | RR   | <b>Ilerda</b>                     | 23a  | Urban                            | U    | *    | Nieto Espinet & Valenzuela Lamas, 2020b                  |
| SC | RR   | <b>Torre Cremada</b>              | 53   | Fortified settlement             | FS   | 110  | Lignereux & Périn, 2006                                  |
| CC | RR   | <b>Can Mateu</b>                  | 101  | Urban                            | U    | 128  | Nieto Espinet & Valenzuela-Lamas, 2019                   |
| CC | RR   | <b>Can Benet</b>                  | 102  | Urban                            | U    | 95   | Nieto Espinet & Valenzuela-Lamas, 2019                   |
| CC | RR   | <b>Can Bartomeu</b>               | 10b  | Silo field                       | SF   | 462  | Valenzuela Lamas & Nieto Espinet, 2019                   |
| CC | RR   | <b>Vilarenc</b>                   | 58a  | Villa                            | V    | *    | Valenzuela Lamas, 2012                                   |
| CC | RR   | <b>Burriac</b>                    | 8    | Urban                            | U    | 264  | Albizuri & Colomer, 1998                                 |
| CC | RR   | <b>Can Feu</b>                    | 12b  | Silo field                       | SF   | 1177 | Mañosa, 1990                                             |
| CC | RR   | <b>Can Roqueta TR</b>             | 15d  | Silo field                       | SF   | 803  | Piña & Saña, 2004                                        |
| CC | RR   | <b>Olèrdola 2</b>                 | 34b  | Fortified settlement             | FS   | 318  | Valenzuela Lamas, 2008                                   |
| CC | RR   | <b>Torre Roja</b>                 | 89c  | Fortified settlement             | FS   | *    | Valenzuela Lamas, 2008                                   |
| CC | RR   | <b>Sant Boi. Pl. Constitució</b>  | 41b  | Villa                            | V    | 370  | Molinas Amorós, 2006                                     |
| NC | RR   | <b>Mas Castellar</b>              | 29c  | Silo field                       | SF   | 1264 | Colominas, 2017                                          |
| NC | RR   | <b>St. Julià de Ramis</b>         | 50b  | Fortified settlement             | FS   | 495  | Colominas, 2017                                          |
| NC | RR   | <b>Sant Sebastià de la Guarda</b> | 44b  | Fortified settlement             | FS   | 1043 | Colominas et al. 2017                                    |
| NC | RR   | <b>Mas Gusó</b>                   | 30   | Villa                            | V    | 889  | Colominas et al. 2017                                    |
| NC | RR   | <b>Olivet d'en Pujol</b>          | 36   | Villa                            | V    | 1017 | Colominas, 2013b                                         |
| NC | RR   | <b>Bosc del Congost</b>           | 7b   | Silo field                       | SF   | 621  | Colominas & Saña, 2009a; Colominas & Saña, 2009b         |
| OP | ERE  | <b>Ilesso</b>                     | 94   | Urban                            | U    | *    | Valenzuela-Lamas & Padrós, 2010                          |
| OP | ERE  | <b>Villa Torre Andreu</b>         | 95   | Villa                            | V    | *    | Casellas, 1993                                           |
| OP | ERE  | <b>Ilerda_ C/ Magdalena 47</b>    | 23c  | Urban                            | U    | 442  | Casellas, 1990a; Casellas, 1990b                         |
| OP | ERE  | <b>Ilerda_ C/ Bafart 46</b>       | 23d  | Urban                            | U    | 143  | Casellas, 1990a; Casellas, 1990b                         |
| CC | ERE  | <b>Villa Vinyet</b>               | 61a  | Villa                            | V    | 540  | Colominas et al., 2017                                   |
| CC | ERE  | <b>Vilarenc</b>                   | 58b  | Villa                            | V    | 153  | Valenzuela Lamas, 2012                                   |
| CC | ERE  | <b>Baetulo</b>                    | 5    | Urban                            | U    | 1207 | Colominas, 2013a                                         |
| CC | ERE  | <b>Can Sant Joan</b>              | 106  | Silo field                       | SF   | *    | Molina Vallmitjana, 2008-2009                            |
| CC | ERE  | <b>Can Rodon</b>                  | 103b | Villa                            | V    | 146  | Nieto Espinet & Valenzuela Lamas, 2019b                  |
| CC | ERE  | <b>Can Feu</b>                    | 12a  | Villa                            | V    | 130  | Mañosa, 1990                                             |
| CC | ERE  | <b>La Llosa</b>                   | 27a  | Villa                            | V    | 334  | Padrós & Valenzuela Lamas, 2010; Valenzuela Lamas, 2010a |
| CC | ERE  | <b>Antigons- wast dump</b>        | 3a   | Villa                            | V    | 537  | Valenzuela Lamas, 2010a                                  |
| CC | ERE  | <b>Torre Llauder</b>              | 54a  | Villa                            | V    | 363  | Valenzuela Lamas & Nieto Espinet, 2020b                  |
| CC | ERE  | <b>Sant Boi. Pl. Constitució</b>  | 41c  | Villa                            | V    | 1499 | Molinas Amorós, 2006                                     |
| CC | ERE  | <b>Can Cruzate</b>                | 11b  | Urban                            | U    | *    | Valenzuela Lamas & Nieto Espinet, 2020a                  |
| NC | ERE  | <b>Vilauba</b>                    | 60a  | Villa                            | V    | 1907 | Colominas, 2013a; Colominas et al. 2017                  |
| NC | ERE  | <b>Tolegassos</b>                 | 52   | Villa                            | V    | 6488 | Casas & Soler Fusté, 2003; Colominas et al., 2017        |
| NC | ERE  | <b>Empúries</b>                   | 19b  | Urban                            | U    | 2235 | Buxó et al., 2007; Colominas, 2017                       |
| OP | LRE  | <b>Ilerda</b>                     | 23b  | Urban                            | U    | 105  | Casellas, 1990a; Casellas, 1990b                         |
| CC | LRE  | <b>Can Cruzate</b>                | 11a  | Urban                            | U    | 289  | Valenzuela Lamas & Nieto Espinet 2020a                   |

|    |     |                          |     |                                  |      |      |                                                            |
|----|-----|--------------------------|-----|----------------------------------|------|------|------------------------------------------------------------|
| CC | LRE | Tarraco                  | 51  | Urban                            | U    | 345  | Miró, 1989b                                                |
| CC | LRE | Villa Vinyet             | 61b | Villa                            | V    | 540  | Colominas et al. 2017                                      |
| CC | LRE | Antigons_Nymphaeum       | 3b  | Villa                            | V    | 108  | Valenzuela Lamas, 2010                                     |
| CC | LRE | Torre Llauder            | 54b | Villa                            | V    | 1077 | Valenzuela Lamas & Nieto Espinet, 2020b                    |
| CC | LRE | La Llosa                 | 27b | Rural settlement                 | RS   | 281  | Padrós & Valenzuela Lamas, 2010;<br>Valenzuela Lamas, 2010 |
| CC | LRE | Sant Boi_Pl. Constitució | 41d | Rural settlement with silo field | RSSF | 371  | Molinas Amorós, 2006                                       |
| NC | LRE | Villa dels Ametllers     | 62  | Villa                            | V    | 251  | Colominas & Saña, 2009b                                    |
| NC | LRE | Vilauba                  | 60b | Villa                            | V    | 638  | Colominas, 2013a; Colominas et al., 2017                   |
| OP | LA  | Vilans de Reig           | 97  | Rural settlement with silo field | RSSF | *    | Nieto Espinet & Escala, 2004                               |
| CC | LA  | Iluro_VI_VII             | 26  | Urban                            | U    | 1569 | Orri & Estrada, 2004                                       |
| CC | LA  | Mallols                  | 28  | Rural settlement with silo field | RSSF | 1684 | Nadal & Estrada, 2007b                                     |
| CC | LA  | Santa Margarida          | 45  | Ecclesiastical                   | E    | 860  | Valenzuela Lamas & Navarro, 2007                           |
| CC | LA  | Solana                   | 49  | Rural settlement with silo field | RSSF | 1400 | Estrada & Nadal, 2007                                      |
| CC | LA  | Can Gambús 1             | 14d | Rural settlement with silo field | RSSF | 8125 | Molina Vallmitjana, 2006                                   |
| CC | LA  | Torre Llauder            | 54c | Rural settlement                 | RS   | 1992 | Valenzuela Lamas & Nieto Espinet, 2020b                    |
| NC | LA  | Sant Martí Empúries      | 43c | Rural settlement                 | RS   | *    | Valenzuela Lamas & Nieto Espinet, 2018                     |
| NC | LA  | Aubert                   | 4   | Rural settlement with silo field | RSSF | 195  | Folch & Gibert, 2014                                       |
| NC | LA  | Empúries                 | 43d | Rural settlement                 | RS   | 223  | Colominas et al. 2017                                      |
| NC | LA  | Vilauba                  | 60c | Rural settlement                 | RS   | 718  | Colominas, 2013a; Colominas et al. 2017                    |

\* The sites that have empty NISP cells correspond to those for which we only have biometric data

**Zones:** Occidental Plaine (OP), South Coast (SC), Central Coast (CC), North Coast (NC).

**Periods:** Late Bronze Age (LBA), Early Iron Age (EIA), Middle Iron Age 1 (MIA1), Middle Iron Age 2 (MIA2), Roman Republic (RR), Early Roman Empire (ERE), Late Roman Empire (LRE), Late Antiquity (LA)

## References

ALBIZURI, S. (1990). *Paleoeconomía y ritualidad. Análisis zoológico del yacimiento ibérico "Turó de Ca n'Olivé" (Cerdanyola, Vallès Occidental)*. Licence Thesi. Departament de Prehistòria, Història Antiga i Arqueologia: Universitat de Barcelona.

ALBIZURI, S. (2008). "Informe de l'estudi arqueozoològic de Can Roqueta / Can Revella 2008 (Sabadell i Barberà del Vallès, Vallès Occidental)". In TERRATS, N.; OLIVA, M. (2009). *El jaciment arqueològic de Can Roqueta-Can Revella (Sabadell i Barberà del Vallès, Vallès Occidental) 2005/2006*. Vol. II. Barcelona: Departament de Cultura, Servei d'Arqueologia: Generalitat de Catalunya. Estudi complementari. Faunal report.

ALBIZURI, S. (2018). "Noves dades sobre la ramaderia a les societats camperoles del bronze final i la primera edat del ferro en les depressions de l'Empordà i la Selva". *Cypsela*. Girona: Museu d'Arqueologia de Catalunya, núm. 21, p. 97-118.

ALBIZURI, S.; COLOMER, S.; RAMADA, X. (1985). "Estudio de la fauna de los silos de la UAB". *Estudios de la Antigüedad*. Barcelona: Universitat Autònoma de Barcelona, núm. 2, p. 219-229.

ALBIZURI, S.; NADAL, J. (1991). *Informe de l'estudi faunístic del jaciment de la Moleta del Remei (Alcanar, Montsià)*. Barcelona: Departament d'Història i Arqueologia, Secció de Prehistòria i Arqueologia, Universitat de Barcelona. Faunal report, cited in Font (2016).

ALBIZURI, S.; NADAL, J. (1993). "Análisis faunístico del yacimiento de Punta Farisa (Fraga, Huesca)". *Estudios de la Antigüedad*. Barcelona: Universitat Autònoma de Barcelona, núm. 6/7, p. 31-37.

ALBIZURI, S.; COLOMER, S. (1998). "Annex: Anàlisi de les restes faunístiques". In MIRÓ, J., PUJOL, J., GARCIA, J. "El dipòsit del sector occidental del poblament ibèric de Búrriac (Cabrera de Mar, El Maresme). Una aportació al coneixement de l'època ibèrica tardana al Maresme (s. I a. C.)". *Laietània*. Mataró: Museu de Mataró, núm. 4, p. 159-180.

ALBIZURI, S.; NADAL, J. (1999a). "Aprovechamiento y producción animal en época ibérica. Consideraciones generales económicas". *Limes: Revista de Arqueología*. Cerdanyola: Col·lectiu de recerques arqueològiques de Cerdanyola, núm. 6-7, p. 40-51.

ALBIZURI, S.; NADAL, J. (1999). "El Barranc de Gáfols (Ginestar, Tarragona) y Aldovesta (Benifallet, Tarragona): El Estudio Arqueozoológico como base de teorización sobre la dieta humana a principios de la edad del hierro y la complejidad económica en el curso bajo del Ebro". *Pyrenae*. Barcelona: Departament d'Història i Arqueologia, Secció de Prehistòria i Arqueologia, Universitat de Barcelona, núm. 30, p. 207-221.

ALBIZURI, S.; COLOMER, S. (2001-2002). "Informe arqueozoológico de Carretelà (Aitona, Segrià, Lleida)". *Revista d'Arqueologia de Ponent*. Lleida: Departament d'Història, Universitat de Lleida, núm. 11-12, p. 235-245.

ALBIZURI, S.; NIETO ESPINET, A.; VALENZUELA LAMAS, S. (2010). "Canvis en l'alimentació càrnia a Catalunya entre els segles XII i III aC". In MATA, C.; PÉREZ JORDÀ, G.; VIVES-FERRÁNDIZ, J. (ed.). *De la cuina a la taula*. IV reunió d'economia en el primer mil·lenni aC celebrada a Caudete de las Fuentes el 22-23 d'octubre del 2009. València: Departament de Prehistòria i Arqueologia, Universitat de València, p. 161-170. (SAGVNTVM: Papeles del laboratorio de arqueología de Valencia; Extra-9).

- BUXÓ, R.; MARTÍ, J. (1994). "La fauna". In OLLICH, I.; ROCAFIGUERA, M. (ed.). *L'oppidum ibèric de l'Esquerda, campanyes 1981-1991 (Les Masies de Roda de Ter, Osona)*. Barcelona: Departament de Cultura, Servei d'Arqueologia: Generalitat de Catalunya, p. 65-68. (Memòries d'Intervencions Arqueològiques a Catalunya; 7).
- BUXÓ, R.; COLOMINAS, L.; SAÑA, M. (2007). "Les espècies de fauna d'Empúries documentades a través de l'arqueozoologia: Palaïopolis, Neapolis i ciutat romana". In AQUILUÉ, X. (ed.). *Animals d'Empúries. La fauna i l'home a l'antiguitat*. L'Escala: Museu d'Arqueologia de Catalunya-Empúries, p. 38-42.
- CASAS, J.; SOLER, V. (2003). *La villa de Tolegassos. Una explotació agrícola de època romana en el territori de Ampurias*. Oxford: Hadrian Books. (BAR International Series; 1101).
- CASELLAS, S. (1990a). *Anàlisi de les restes faunístiques de la intervenció 46 (Carrer Bafart) de la ciutat de Lleida*. Lleida: Servei d'Arqueologia (Ajuntament de Lleida), Departament d'Història (Universitat de Lleida). Faunal report.
- CASELLAS, S. (1990b). *Anàlisi de les restes faunístiques de la intervenció 47 (c/ costa de Magdalena) de la ciutat de Lleida*. Lleida: Servei d'Arqueologia (Ajuntament de Lleida), Departament d'Història (Universitat de Lleida). Faunal report.
- CASELLAS, S. (1993). "Restes faunístiques". In Pérez, A., Rafel, N. (dir.). *La vil·la romana de Torre Andreu (La Bordeta, Lleida). Un establiment suburbà dels segles UU-III dC*. Monografies d'Arqueologia Urbana, núm. 5, p. 91-97.
- CASELLAS, S. (1999a). "Les restes de fauna". In AQUILUÉ, X.; SANTOS, M.; ALCALDE, G. (ed.). *Intervencions arqueològiques a Sant Martí d'Empúries (1994-1996). De l'assentament precolonial a l'Empúries actual*. Girona: Museu d'Arqueologia de Catalunya-Empúries, Generalitat de Catalunya, p. 636-638. (Monografies Emporitanes; 9).
- CASELLAS, S. (1999b). "Els Macromamífers". In MARTÍN, A.; BUXÓ, R.; LÓPEZ MELCIÓN, J.; MATARÓ, M. (dir.). *Excavacions arqueològiques a l'Illa d'en Reixac (1987-1992)*. Girona: Museu d'Arqueologia de Catalunya-Ullastret, p. 299-303. (Monografies d'Ullastret; 1).
- CASELLAS, S.; MONTÓN, S.; MARTÍNEZ, J. (1999). "Les restes faunístiques de Can Roqueta. Campanyes de 1990 i 1992". In GONZÁLEZ MARCÉN, P.; MARTÍN, A.; MORA, R. (ed.). *Can Roqueta. Un establiment pagès prehistòric i medieval (Sabadell, Vallès Occidental)*. Barcelona: Direcció General del Patrimoni Cultural, Servei d'Arqueologia, p. 255-258. (Excavacions arqueològiques a Catalunya; 16).
- CASTAÑOS, P. (1988). "Estudio de los restos faunísticos del yacimiento de Zafranales". In MONTÓN, F. (ed.). *Zafranales, un asentamiento musulmán y un hábitat del Bronce, Anales*. Barbastro-Zaragoza: Universidad Nacional de Educación a Distancia, p. 147-165. (Anuario del Centro de la Universidad Nacional de Educación a Distancia; 5).
- CASTAÑOS, P. (1994). "Estudio de los restos óseos". In OLIVER, A. (ed.). *El poblado ibérico del Puig de la Misericòrdia de Vinaròs*. Vinaròs: Associació Cultural Amics de Vinaròs, p. 155-186.
- CASTAÑOS, P. (1995). "Análisis faunístico". In OLIVER, A.; GUSI, F. (ed.). *El Puig de la Nau: un hábitat fortificado ibérico en el ámbito mediterráneo peninsular*. Castelló: Diputació Provincial de Castelló. Servei d'Investigacions Arqueològiques i Prehistòriques, p. 307-336.
- COLOMER, M. À. (1989). *Estudi arqueozoològic del jaciment del bronze final de la Fonollera (Torroella del Montgrí, Baix Empordà)*. Treball de recerca. Barcelona: Departament de la Universitat Autònoma de Barcelona.
- COLOMINAS, L. (2013a). *Arqueozoologia y Romanización. Producción, distribución y consumo de animales en el noreste de la península ibérica entre los siglos V a. n. e. - V d. n. e.* Oxford: Hadrian Books. (BAR International Series; 2480).
- COLOMINAS, L. (2013b). "Gestió i explotació ramadera a l'Olivet d'en Pujol (Viladamat, Alt Empordà) durant la segona meitat del segle I aC: l'exemple d'un model ramader totalment romanitzat". *Annals*. Girona: Institut d'Estudis Gironins, núm. 54, p. 185-198.
- COLOMINAS, L. (2017). "Roman conquest and changes in animal husbandry in the North-East of the Iberian Peninsula: Searching for patterns, rates and singularities". In VALENZUELA LAMAS, S.; COLOMINAS, L.; FERNÁNDEZ RODRÍGUEZ, C. (ed.). *La Romanización de la Península Ibérica, una visión desde la Arqueozoología. Archaeofauna: International Journal of archaeozoology*. Madrid: Universidad Autónoma de Madrid, núm. 26, p. 9-22.
- COLOMINAS, L.; SAÑA, M. (2009a). "Dinàmica de formació i variabilitat dels conjunts de restes de fauna recuperats al jaciment del Bosc del Congost: gestió animal entre el 325 aC i el 100aC". In BURCH, J.; SAGRERA, J. (ed.). *Els sitjars*. Girona i Sant Julià de Ramis: Universitat de Girona i Ajuntament de Sant Julià de Ramis, p. 155-78. (Excavacions arqueològiques a la muntanya de Sant Julià de Ramis; 3).
- COLOMINAS, L.; SAÑA, M. (2009b). "Animal husbandry in the North-East of Catalonia from the 1st to the 5th Century AD: improvement and importation". *The territory and its resources*. Girona: Laboratori d'Arqueologia i Prehistòria de la Universitat de Girona, p. 9-26 (Studies on the Rural World in the Roman Period; 4).
- COLOMINAS, L.; ANTOLÍN, F.; FERRER, M.; CASTANYER, P.; TREMOLEDA, J. (2017a). "From Vilauba to Vila Alba: Changes and continuities in animal and crop husbandry practices from the Early Roman to the beginning of the Middle Ages in the north-east of the Iberian Peninsula". *Quaternary International*. Vol. 499. Amsterdam: Elsevier, p. 67-79.
- COLOMINAS, L.; RODRÍGUEZ, C. F.; ERES, M. P. I. (2017b). Animal husbandry and hunting practices in Hispania Tarraconensis: an overview. *European Journal of Archaeology*, 20(3), 510.
- ESTÉVEZ, J. (1977). "Estudio de la fauna". In PONS, E. (dir.). *La Fonollera (Torroella de Montgrí, Girona). Un poblado al aire libre del Bronce Final*. Girona: Centre d'Investigacions Arqueològiques. (Sèrie Monogràfica; 1).
- ESTRADA, A.; NADAL, J. (2007). "La Solana. Estudi zoològic del jaciment". In BARRASETAS, E. (coord.). *La Solana. Memòria de l'excavació arqueològica al jaciment (Cubelles, el Garraf)*. Barcelona: Departament de Cultura i Mitjans de Comunicació de la Generalitat de Catalunya, Barcelona. (Memòries d'Intervenció Arqueològica).
- FOLCH, C., GIBERT, J. (2014). "L'Aubert (la vall d'en Bas, la Garrotxa) (segles VI-X dC): un assentament rural en els orígens del Comitatus Bisuldunense". *Quaderns de les*

*Assembles d'Estudis*. Centre d'Estudis Amics de Besalú i el seu comtat, núm. 1, p. 143-156.

FONT, L. (2016). *La gestió dels recursos animals a la Catalunya meridional i de ponent durant la protohistòria (segles VII-I a. n. e.)*. Avaluació econòmica, política i social a partir de les restes de fauna. PhD. Barcelona: Departament d'Història i Arqueologia, Secció de Prehistòria i Arqueologia, Universitat de Barcelona.

GÓMEZ, X. (2000). *Noves dades sobre l'explotació de base animal durant la protohistòria a la plana occidental catalana*. Lleida: Departament d'Història, Universitat de Lleida. License These unpublished.

LIGNEREUX, Y.; PÉRIN, N. (2006). "Les restes fauniques de Torre Cremada". In MORET, P. M.; BENAVENTE, J. A.; GORGUES, A. (ed.). *Iberos del Matarranya: investigaciones arqueológicas en Valdeltormo, Calaceite, Cretas y La Fresneda (Teruel)*. Alcañiz: Taller de Arqueologia de Alcañiz i Casa de Velázquez, p. 293-298. (Al-Quannis, Boletín del Taller de Arqueologia de Alcañiz; 11).

MAÑOSA, M. (1990). *Informe de l'anàlisi de la fauna del jaciment de Can Feu (St. Quirze del Vallès, Vallès Occidental)*. Barcelona: Departament de Cultura, Servei d'Arqueologia de Barcelona, Generalitat de Catalunya. Faunal report.

MIRÓ, J. M. (1989a). "Estudi de la fauna". In GALLART, J.; JUNYENT, E. (ed.). *Un nou tall estratigràfic a la Pedrera, Vallfogona de Balaguer (Termens, La Noguera, Lleida)*. Lleida: Quaderns del Departament de Geografia i Història de l'Estudi General de Lleida, p. 80-101. (Col·lecció Espai/Temps; 3).

MIRÓ, J. M. (1989b). "La fauna". In DUPRÉ, X. (ed.). *Un abocador del segle V d. C. en el fòrum provincial de Tarraco*. Tarragona: Taller Escola d'Arqueologia, p. 403-414. (Memòries d'Excavació; 2).

MIRÓ, J. M. (1992). "La Macrofauna". In GARCÉS, J.; JUNYENT, E.; LAFUENTE, Lafuente; LÓPEZ MELCIÓN, Joan B. (dir.). *Dinàmica Paleoeològica i Paleoeconòmica en l'assentament de "Els Vilars" (Arbeca, les Garrigues)*. Lleida: Secció d'Arqueologia Prehistòria i Història Antiga, Departament d'Història, Universitat de Lleida. Faunal report.

MIRÓ, C.; MOLIST, N. (1982). "La fauna". In BARBERÀ, J.; SANMARTÍ GREGO, E. (ed.). *Excavacions al poblat ibèric de la Penya del Moro de Sant Just Desvern (Barcelonès): campanyes 1974-1975 i 1977-1981*. Barcelona: Diputació de Barcelona, Institut de Prehistòria i Arqueologia, p. 123-132. (Monografies Arqueològiques; 1).

MOLINA VALLMITJANA, J. A. (2006). "Annex 26: Estudi de les restes arqueozoològiques dels nivells tardoantics (s. VI-VII) de Can Gambús-1 (Sabadell, Vallès Occidental)". In ROIG, J.; COLL RIERA, J. M. (2006). *Memòria d'intervenció arqueològica a Can Gambús 1 (Sabadell, Vallès Occidental). Abril 2003-Desembre 2004 i agost 2006*. Arrago SL. Barcelona: Departament de Cultura, Servei d'Arqueologia: Generalitat de Catalunya. (Memòries d'Intervenció Arqueològica; 7416, vol. 22).

MOLINA VALLMITJANA, J. A. (2008-2009). "Estudi de les restes arqueozoològiques del jaciment de Can Sant Joan". In: Gea Bullich, M. (2008-2009). *Memòria de la intervenció arqueològica a Can Sant Joan, parcel·la 15A, Rubí. (novembre 2008)*. Arxiu Servei d'Arqueologia i Paleontologia. Mem.Núm. 7323.

MOLINAS AMORÓS, R. (2006). *Informe arqueològic sobre la gestió dels recursos animals al jaciment de Plaça Constitució (Sant Boi)*. ArqueoCat SL: Arqueologia i Patrimoni. Faunal report.

MONTERO, M. (2000). *Les restes de macrofauna del jaciment de Ciutadella de Roses (Girona)*. Barcelona: Laboratori d'Arqueozoologia, Departament de Prehistòria, Universitat Autònoma de Barcelona. Citat per Colominas i Saña, 2011. License These unpublished.

NADAL, J.; ESTRADA, A. (2003). "Estudi de les restes faunístiques de Puig Castellar (Annex 3)". In FERRER, C.; RIGO, A. (ed.). *Els ibers a Santa Coloma de Gramanet. 5 anys d'intervenció arqueològica (1998-2002)*. Santa Coloma de Gramanet: Museu Torre Balldovina, Ajuntament de Santa Coloma de Gramanet, p. 174-182. (Monografies locals; 2).

NADAL, J.; ESTRADA, A. (2007b). "Estudi de fauna". In FRANCÈS, J. (coord.). *Els Mallols. Un jaciment de la plana del Vallès entre el neolític i l'antiguitat tardana*. Barcelona: Departament de Cultura i Mitjans de Comunicació, Generalitat de Catalunya, p. 265-301. (Excavacions arqueològiques a Catalunya; 17).

NIETO ESPINET, A. (2002). *Anàlisi arqueofaunística del jaciment protohistòric de Vincamet (Fraga, Huesca)*. TAD (Treball Acadèmicament Dirigit). Lleida: Departament d'Història, Universitat de Lleida.

NIETO ESPINET, A. (2012). *Entre el consum i l'afecte. La interacció entre els animals i les comunitats protohistòriques de la plana occidental catalana (segles VII-IV aC)*. Lleida: Departament d'Història, Universitat de Lleida. Accés lliure al TDX (<https://www.tdx.cat/handle/10803/96488>).

NIETO ESPINET, A. (2013). *Informe de les restes faunístiques recuperades al jaciment de la Rosella (Tàrraga, Lleida)*. Lleida: Departament d'Història, Universitat de Lleida. Faunal report.

NIETO ESPINET, A. (2014). *Informe de les restes faunístiques recuperades Sikarra (Prats del Rei, Barcelona)*. Lleida: Departament d'Història, Universitat de Lleida. Faunal report.

NIETO ESPINET, A.; ESCALA, Ò. (2004). "Vilans de Reig (els Torms, les Garrigues): un assentament rural del s. VII dC". *Revista d'arqueologia de Ponent*, (14), 275-286.

NIETO ESPINET, A.; VALENZUELA LAMAS, S.; TRENTACOSTE, A. (2019). *Informe de la fauna recuperada al jaciment de Mas d'en Boixos (Vilafranca del Penèdes, Barcelona)*. Faunal report, Vinseum, Museu de Vilafranca.

NIETO ESPINET, A.; VALENZUELA LAMAS, S. (2019) *Informe de la fauna recuperada al jaciments de Can Mateu, Can Rodon i Can Benet (Cabrera de Mar, Barcelona)*, Faunal report, Museu de Mataró.

NIETO ESPINET, A.; VALENZUELA LAMAS, S. (2020a) *Informe de la fauna recuperada al jaciment del Molí Espigol (Tornabous, Lleida)*, Faunal report, MAC-Barcelona.

NIETO ESPINET, A.; VALENZUELA LAMAS, S. (2020b) *Primers resultats de l'estudi de la fauna recuperada en els nivells romans de l'antiga Ilerda (Lleida)*. Faunal report, Servei d'Arqueologia, Ajuntament de Lleida.

OLIVA, M. A. (1998). *Anàlisi arqueozoològica de l'assentament ibèric del Turó del Vent (Llinars del Vallès)*.

Treball de recerca. Barcelona: Departament d'Antropologia Social i Prehistòria, Universitat Autònoma de Barcelona.  
OLIVA, M. A. (2000). "La ramaderia del poblat ibèric del Turó del Vent". *SAGVNTVM Extra*. Vol. 3. València: Departament de Prehistòria i Arqueologia de la Universitat de València, p. 165-166.

ORRI, E. (2005-2006). "Informe de l'estudi de la fauna recuperada al jaciment de Can Gambús-3 (Sabadell, Vallès Occidental)". In CODINA, D.; ARTIGUES, P. L. *Memòria de la intervenció arqueològica a Can Gambús 3*. Agost del 2005-2006. Sabadell (Vallès Oriental). Janus SL. Barcelona: Departament de Cultura, Servei d'Arqueologia: Generalitat de Catalunya. (Memòries d'Intervenció Arqueològica; 7017). Faunal report.

ORRI, E.; ESTRADA, A. (2004). "Annex III. Estudi de les restes faunístiques i malacològiques". In REVILLA, V.; CELA, X. *La transició del municipium d'Illuro a Alarona (Mataró): Cultura material i transformacions d'un espai urbà entre els segles V i VII dC. Laietània: estudis d'arqueologia del Maresme*. Mataró: Museu de Mataró, núm. 15, p. 543-555.

PADRÓS, N.; VALENZUELA LAMAS, S. (2010). "La Llosa i els Antigons, una aproximació a la producció ramadera de les *villae* de l'ager *Tarraconensis*. Segles III-VI dC". In PREVOSTI, M.; GUITART, J. (ed.). *Ager Tarraconensis I. Aspectes històrics i marc natural*. Tarragona: Institut Català d'Arqueologia Clàssica, p. 200-207. (Documenta; 16).

PIÑA, A.; SAÑA, M. (2004). "Informe de l'anàlisi arqueozoològica dels conjunts de restes de fauna recuperats al jaciment de Can Roqueta / Torre-romeu (Sabadell, Vallès Occidental)". In OLIVA, M., TERRATS, N. (2004). *El jaciment arqueològic de Can Roqueta / Torre Romeu (Sabadell, Vallès Occidental). Campaña 2002-2003*. Barcelona: Departament de Cultura, Servei d'Arqueologia: Generalitat de Catalunya. Faunal report.

VALENZUELA LAMAS, S. (2008). *Alimentació i ramaderia al Penedès durant la protohistòria: segles VII-III aC*. Barcelona: Societat Catalana d'Arqueologia.

VALENZUELA LAMAS, S. (2010a). "Paisatge, alimentació i gestió de ramats als Antigons a partir de les restes de fauna (vertebrats i mol·luscos)". In PREVOSTI, M.; GUITART, J. (ed.). *Ager Tarraconensis I. Aspectes històrics i marc natural*. Tarragona: Institut Català d'Arqueologia Clàssica, p. 181-192. (Documenta; 16).

VALENZUELA LAMAS, S. (2012). *Informe de les restes faunístiques de la vil·la romana del Vilarenc*. Barcelona: Departament d'Història i Arqueologia, Secció de Prehistòria i Arqueologia, Universitat de Barcelona. Faunal report.

VALENZUELA LAMAS (2017). *Informe de la fauna recuperada a la zona 14 del Puig de Sant Andreu (Ullastret, Girona)*. Faunal report, MAC-Ullastret.

VALENZUELA LAMAS, S.; NAVARRO, R. (2007). "Un conjunt faunístic de finals de l'Antiguitat tardana al jaciment de Santa Margarida (Martorell, Baix Llobregat)". *Pyrenae*. Barcelona: Departament d'Història i Arqueologia, Secció de Prehistòria i Arqueologia, Universitat de Barcelona, núm. 38, p. 105-127.

VALENZUELA LAMAS, S.; NADAL, J.; LÓPEZ, D. (2010). "La fauna del jaciment de Mas d'en Gual (el Vendrell, Baix Penedès) en el context dels assentaments especialitzats d'època ibèrica". *Revista d'Arqueologia de Ponent*. Lleida: Departament d'Història, Universitat de Lleida, núm. 20, p. 215-224.

VALENZUELA LAMAS, S.; NIETO ESPINET, A. 2020. "Noves evidències de la pràctica d'un banquet en el món ibèric? Els conjunts faunístics de tres sitges del jaciment de Can Rodon de l'Hort (Cabrera de Mar, El Maresme)". *Laietània*, núm. 21, p. 57-75.

VALENZUELA LAMAS, S., PADRÓS, N. (2010). Què diu la mida dels animals? Osteometria dels macromamífers de la *Tarraconensis* entre l'edat del ferro i l'època imperial, *Simposi Internacional Ager Tarraconensis*, Tarragona, octubre 2010.

VALENZUELA LAMAS, S.; NIETO ESPINET, A. (2018) *Informe de la fauna recuperada al jaciment de Sant Martí d'Empúries (Empúries, Girona)*. Faunal report, MAC-Empúries.

VALENZUELA LAMAS, S.; NIETO ESPINET, A. (2019) *Informe de la fauna recuperada al jaciment de Can Bartomeu (Cabrera de Mar, Barcelona)*. Faunal report, Museu de Mataró.

VALENZUELA LAMAS, S.; NIETO ESPINET, A. (2020a) *Informe de la fauna recuperada al jaciment de Can Cruzate (Mataró, Barcelona)*. Faunal report, Museu de Mataró.

VALENZUELA LAMAS, S.; NIETO ESPINET, A. (2020b) *Informe de la fauna recuperada a la domus romana de Torre Llauder (Mataró, Barcelona)*. Faunal report, Museu de Mataró.

VALENZUELA LAMAS, S.; VALENZUELA SUAU, L.; JIMÉNEZ MANCHÓN, S.; CODINA, F.; PLANA, R.; MARTÍN, A. (2017). "Consum carni i artesanat en os als afores del Puig de Sant Andreu: el jaciment ibèric del Camp d'en Gou, Gorg d'en Batlle (Ullastret, Baix Empordà)". *Empúries*. Girona: Museu d'Arqueologia de Catalunya, núm. 57, p. 7-26.
