# Supplementary material for: Resilience and livestock adaptations to demographic growth and technological change: A diachronic perspective from the Late Bronze Age to Late Antiquity in NE Iberia
Source: PubMed Central journal article supplement (PMC7888671; doi:10.1371/journal.pone.0246201), 2021-02-17
Supplement: pone.0246201.s007.pdf [file pone.0246201.s007.pdf]

BOTA Length

|      |       |       |       |       |       |     |
|------|-------|-------|-------|-------|-------|-----|
| LA   | 0     | 0     | 0     | 0     | 0.6   | -   |
| LRE  | 0.001 | 0.001 | 0.016 | 0.051 | -     | 0.6 |
| ERE  | 0     | 0     | 0     | -     | 0.051 | 0   |
| RR   | 0.003 | 0.057 | -     | 0     | 0.016 | 0   |
| MIA2 | 0.064 | -     | 0.057 | 0     | 0.001 | 0   |
| MIA1 | -     | 0.064 | 0.003 | 0     | 0.001 | 0   |
|      | MIA1  | MIA2  | RR    | ERE   | LRE   | LA  |

BOTA Width

|      |       |       |       |       |       |       |       |       |
|------|-------|-------|-------|-------|-------|-------|-------|-------|
| LA   | 0.001 | 0.001 | 0     | 0     | 0     | 0.006 | 0.185 | -     |
| LRE  | 0.001 | 0.001 | 0     | 0     | 0     | 1     | -     | 0.185 |
| ERE  | 0     | 0     | 0     | 0     | 0     | -     | 1     | 0.006 |
| RR   | 0.085 | 0.084 | 0.001 | 0.153 | -     | 0     | 0     | 0     |
| MIA2 | 0.234 | 0.22  | 0.009 | -     | 0.153 | 0     | 0     | 0     |
| MIA1 | 0.712 | 0.894 | -     | 0.009 | 0.001 | 0     | 0     | 0     |
| EIA  | 0.955 | -     | 0.894 | 0.22  | 0.084 | 0     | 0.001 | 0.001 |
| LBA  | -     | 0.955 | 0.712 | 0.234 | 0.085 | 0     | 0.001 | 0.001 |
|      | LBA   | EIA   | MIA1  | MIA2  | RR    | ERE   | LRE   | LA    |

SUDO Length

|      |       |       |       |       |       |       |       |
|------|-------|-------|-------|-------|-------|-------|-------|
| LA   | 0.4   | 0.643 | 0.098 | 0.035 | 0.44  | 0.667 | -     |
| LRE  | 0.8   | 0.429 | 0.498 | 0.12  | 1     | -     | 0.667 |
| ERE  | 0.248 | 0.335 | 0.202 | 0.009 | -     | 1     | 0.44  |
| RR   | 1     | 0.039 | 0.247 | -     | 0.009 | 0.12  | 0.035 |
| MIA2 | 0.799 | 0.033 | -     | 0.247 | 0.202 | 0.498 | 0.098 |
| MIA1 | 0.262 | -     | 0.033 | 0.039 | 0.335 | 0.429 | 0.643 |
| EIA  | -     | 0.262 | 0.799 | 1     | 0.248 | 0.8   | 0.4   |
|      | EIA   | MIA1  | MIA2  | RR    | ERE   | LRE   | LA    |

SUDO Width

|      |       |       |       |       |       |       |       |
|------|-------|-------|-------|-------|-------|-------|-------|
| LA   | 0.63  | 0.935 | 0.612 | 0.934 | 0.708 | 0.282 | -     |
| LRE  | 0.497 | 0.108 | 0.028 | 0.064 | 0.027 | -     | 0.282 |
| ERE  | 0.229 | 0.382 | 0.445 | 0.492 | -     | 0.027 | 0.708 |
| RR   | 0.624 | 0.911 | 0.292 | -     | 0.492 | 0.064 | 0.934 |
| MIA2 | 0.139 | 0.152 | -     | 0.292 | 0.445 | 0.028 | 0.612 |
| MIA1 | 0.543 | -     | 0.152 | 0.911 | 0.382 | 0.108 | 0.935 |
| EIA  | -     | 0.543 | 0.139 | 0.624 | 0.229 | 0.497 | 0.63  |
|      | EIA   | MIA1  | MIA2  | RR    | ERE   | LRE   | LA    |

OC Length

|      |       |       |       |       |       |       |       |       |
|------|-------|-------|-------|-------|-------|-------|-------|-------|
| LA   | 0.059 | 0.003 | 0.954 | 0.569 | 0.162 | 0.415 | 0.611 | -     |
| LRE  | 0.029 | 0.016 | 0.907 | 0.772 | 0.588 | 0.631 | -     | 0.611 |
| ERE  | 0.08  | 0.007 | 0.892 | 0.374 | 0.993 | -     | 0.631 | 0.415 |
| RR   | 0.011 | 0     | 0.681 | 0.187 | -     | 0.993 | 0.588 | 0.162 |
| MIA2 | 0.037 | 0.001 | 0.847 | -     | 0.187 | 0.374 | 0.772 | 0.569 |
| MIA1 | 0.242 | 0.044 | -     | 0.847 | 0.681 | 0.892 | 0.907 | 0.954 |
| EIA  | 0.795 | -     | 0.044 | 0.001 | 0     | 0.007 | 0.016 | 0.003 |
| LBA  | -     | 0.795 | 0.242 | 0.037 | 0.011 | 0.08  | 0.029 | 0.059 |
|      | LBA   | EIA   | MIA1  | MIA2  | RR    | ERE   | LRE   | LA    |

OC Width

|      |       |       |       |       |       |       |       |       |
|------|-------|-------|-------|-------|-------|-------|-------|-------|
| LA   | 0.136 | 0     | 0     | 0.906 | 0.277 | 0     | 0     | -     |
| LRE  | 0.103 | 0     | 0     | 0.001 | 0.029 | 0.103 | -     | 0     |
| ERE  | 0.093 | 0     | 0     | 0     | 0     | -     | 0.103 | 0     |
| RR   | 0.23  | 0     | 0     | 0.214 | -     | 0     | 0.029 | 0.277 |
| MIA2 | 0.274 | 0     | 0     | -     | 0.214 | 0     | 0.001 | 0.906 |
| MIA1 | 0.55  | 0.162 | -     | 0     | 0     | 0     | 0     | 0     |
| EIA  | 0.689 | -     | 0.162 | 0     | 0     | 0     | 0     | 0     |
| LBA  | -     | 0.689 | 0.55  | 0.274 | 0.23  | 0.093 | 0.103 | 0.136 |
|      | LBA   | EIA   | MIA1  | MIA2  | RR    | ERE   | LRE   | LA    |
